1 **Bacterial derived vitamin B12 enhances predatory behaviors**  
2 **in nematodes**

3 **Nermin Akduman<sup>1</sup>, James W. Lightfoot<sup>1</sup>, Waltraud Röseler<sup>1</sup>, Hanh Witte<sup>1</sup>, Wen-**  
4 **Sui Lo<sup>1</sup>, Christian Rödelsperger<sup>1</sup>, Ralf J. Sommer<sup>1\*</sup>**

5 \*corresponding author: ralf.sommer@tuebingen.mpg.de

6 **Affiliations:** <sup>1</sup>Department for Evolutionary Biology, Max Planck Institute for  
7 Developmental Biology, Max Planck Ring 9, 72076 Tübingen Germany

8 **KEYWORDS**

9 Microbiome, microbiota, diet, surplus killing, metabolism, development, *Pristionchus*  
10 *pacificus*, *Caenorhabditis elegans*

11 **The microbiome is known to affect host development, metabolism and**  
12 **immunity, however, its impact on behaviors is only beginning to be**  
13 **understood. Here, we investigate how bacteria modulate complex behaviors in**  
14 **the nematode model organism *Pristionchus pacificus*. *P. pacificus* is a**  
15 **predator feeding on the larvae of other nematodes including *Caenorhabditis***  
16 ***elegans*. Growing *P. pacificus* on different bacteria and testing their ability to**  
17 **kill *C. elegans* reveals drastic differences in killing efficiencies with a**  
18 ***Novosphingobium* species showing the strongest enhancement. Strikingly,**  
19 **increased killing was not accompanied by an increase in feeding, a**  
20 **phenomenon known as surplus-killing whereby predators kill more prey than**  
21 **necessary for sustenance. RNA-seq revealed widespread metabolic rewiring**  
22 **upon exposure to *Novosphingobium*, which facilitated the screening for**  
23 **bacterial mutants leading to an altered transcriptional response. This identified**  
24 **bacterial derived vitamin B12 as a major micronutrient enhancing predatory**  
25 **behaviors. Vitamin B12 is an essential cofactor for detoxification and**  
26 **metabolite biosynthesis and has previously been shown to accelerate**  
27 **development in *C. elegans*. In *P. pacificus* vitamin B12 supplementation**  
28 **amplified, whereas mutants in vitamin B12-dependent pathways reduced**  
29 **surplus-killing. This demonstrates that bacterial vitamin B12 affects complex**  
30 **behaviors and thus establishes a connection between microbial diet and the**  
31 **nervous system.**

32

33 The microbiome is considered a fundamental aspect of a host's biology and is known  
34 to provide developmental cues, influence metabolism and alter immunity<sup>1-3</sup>. However,  
35 the microbiome constitutes a complex network of microorganisms and disentangling  
36 specific interactions and effects at a mechanistic level is challenging. Bacterial-  
37 feeding nematodes constitute a highly attractive system to study the influence of the  
38 microbiome because specific interactions can be investigated in monoxenic cultures  
39 where the microbiome and diet are indistinguishable from one another and easily  
40 controlled. To study the effect of bacteria on behavior we investigate the nematode  
41 model organism *Pristionchus pacificus* that exhibits a particular complex behavior  
42 unknown from *C. elegans*. In general, *P. pacificus* is an omnivorous nematode that  
43 can grow on bacteria, fungi and it can predate on other nematodes<sup>4-6</sup>. Predation is  
44 dependent on morphological and behavioral novelties, involving the formation of  
45 teeth-like denticles and a self-recognition mechanism<sup>7-10</sup>. The ability to form teeth-like  
46 denticles is an example of developmental plasticity with two discrete mouth-forms<sup>11</sup>.  
47 The stenostomatous morph has a single blunt tooth, whereas the eurytostomatous  
48 morph has two large teeth with only the latter capable of predation (Fig. 1A and B)<sup>7</sup>.  
49 Predation may confer a selective advantage in certain environmental settings with  
50 previous studies indicating that different culture conditions, including microbial diet,  
51 are able to modulate the ratio of the two mouth forms<sup>12,13</sup>. Furthermore, *P. pacificus*  
52 predation under laboratory conditions is also an example of a phenomenon known as  
53 surplus-killing behavior<sup>6</sup>. Surplus-killing is a well-documented complex behavior  
54 observed in many predators across the animal kingdom, in which more prey are  
55 killed than nutritionally required<sup>14-22</sup>. Theoretical and experimental studies considered  
56 surplus-killing a potentially context-dependent, adaptive foraging strategy or  
57 alternatively, a context-general syndrome of high aggression<sup>15,17,20-23</sup>. However, the  
58 full impact of diet on killing and predation is currently poorly understood.

59 Therefore, we tested the effect of 25 different bacteria recently isolated from  
60 *Pristionchus*-associated environments<sup>24</sup> on various predation associated traits.  
61 Specifically, we grew *P. pacificus* for several generations on monoxenic cultures and  
62 investigated the effect on mouth form ratio, pharyngeal pumping, and killing behavior  
63 by comparing them to standard laboratory cultures grown on *Escherichia coli* OP50.  
64 While diet had a limited effect on mouth form ratios and pharyngeal pumping, we  
65 found up to a four-fold difference in killing efficiency depending on microbial diet (Fig.  
66 1C, fig. S1A and B). The strongest effect on killing efficiency was observed when *P.*  
67 *pacificus* was fed upon three alpha-proteobacteria of the genera *Novosphingobium*  
68 and *Rhizobium*, resulting in up to 160 corpses of dead prey in standardized corpse

69 assays (Fig. 1C). We therefore focused on one bacterium of this group,  
70 *Novosphingobium* L76.

71 Stronger killing efficiency translated into higher rates of surplus-killing.  
72 Specifically, we performed bite assays to observe individual predators for 10 minutes  
73 to distinguish specific predatory events including biting, successful biting that results  
74 in penetration of the cuticle, and feeding on prey larvae (see Method section for exact  
75 description of terms). When grown on *E. coli* OP50, *P. pacificus* only kills 50% of its  
76 prey after biting, and subsequent feeding was only observed in roughly 10% of all  
77 cases (Fig. 1D, Movie S1). Using *Novosphingobium* L76, we found that the number  
78 of *P. pacificus* bites and successful biting events indeed doubled relative to *E. coli*  
79 OP50 grown predators (Fig. 1D). However, we found no increase in feeding on the  
80 dead prey (Fig. 1D). Instead, predators rapidly moved over agar plates searching for  
81 new prey items. Thus, a *Novosphingobium* diet enhances predation and surplus-  
82 killing.

83 Next, we established the necessary bacterial exposure time required to  
84 influence predatory behavior and additionally, wanted to know whether the increase  
85 in killing was mediated by factors secreted by the bacteria or solely by their ingestion.  
86 Only a limited exposure to a diet of *Novosphingobium* L76 during development was  
87 sufficient for *P. pacificus* nematodes to exhibit increased predatory behavior,  
88 however, *Novosphingobium* L76 culture supernatants alone were unable to  
89 recapitulate this effect (Fig. 1E, fig. S1C). In contrast, when *Novosphingobium* was  
90 diluted with *E. coli* OP50, the effect still persisted suggesting that the response to  
91 *Novosphingobium* L76 is unlikely due to differences in caloric intake (fig. S1D).  
92 Instead, the behavioral change is likely a result of physiological alterations caused by  
93 the different nutritional composition of *Novosphingobium* L76. Therefore, we  
94 analyzed the transcriptomic response of young *P. pacificus* adults grown on  
95 *Novosphingobium* in comparison with *E. coli*. We identified a total of 2,677 (9%)  
96 genes with significant differential expression (FDR corrected P-value < 0.05)  
97 between the two bacterial diets (Table S1). Most strikingly, more than half of all  
98 genes that are predicted to be involved in fatty acid metabolism are significantly  
99 differentially expressed between the two diets (Fig. 2A and B).

100 To study the mechanisms by which *Novosphingobium* alters fatty acid  
101 metabolism and induces behavioral changes in the nematode, we used an unbiased  
102 bacterial mutagenesis approach. We replaced *Novosphingobium* L76 with  
103 *Novosphingobium lindaniclasticum* LE124 (*N. lin.* LE124 thereafter), as the latter can  
104 easily be manipulated by transposon mutagenesis, has an available genome<sup>25</sup>, and  
105 induces similar behavioral effects in *P. pacificus* (fig. S1E). Additionally, to detect any

106 physiological changes in *P. pacificus* caused by mutations in the bacteria, two dietary  
107 sensors were generated using *P. pacificus* fatty acid metabolism genes that showed  
108 differential expression on different bacteria (Fig 2A and B). Specifically, we used  
109 homologs of the acyl-CoA synthetase enzyme *Ppa-acs-19.1*, which was upregulated  
110 on *E. coli* OP50 and downregulated on *Novosphingobium*, as well as the short-chain  
111 dehydrogenase reductase enzyme *Ppa-stdh-1*, which has the opposite expression  
112 profile (Fig. 2C and D, fig. S2). Both reporter lines confirmed the differential  
113 expression that was detected by RNA-seq with *Ppa-acs-19.1* being expressed nearly  
114 exclusively on *E. coli*, whereas *Ppa-stdh-1* is expressed highly on *Novosphingobium*  
115 but only minimally on *E. coli* OP50 (Fig. 2C and D). Subsequently, we used these  
116 dietary sensors to screen for bacterial mutants that fail to differentially regulate these  
117 genes. From a library of 4,320 *N. lin.* LE124 mutants, three affected the expression of  
118 *Ppa-stdh-1* and 21 altered the expression of *Ppa-acs-19.1*. Whole genome  
119 sequencing of these bacterial mutants identified transposon insertions in genes  
120 corresponding to four biological pathways: purine and pyrimidine metabolism,  
121 nitrogen metabolism, and vitamin B12 (Fig. 2E; fig. S2C, key resources table).  
122 Importantly, in mutants of all four pathways, the change of transcriptomic response  
123 coincided with a reduction in predatory behavior including surplus-killing relative to  
124 wild-type *N. lin.* LE124 (Fig. 2F, fig. S2D and E). Thus, the dietary sensor allows the  
125 identification of factors regulating complex behavioral traits.

126 Vitamin B12 has been shown to be a crucial co-factor involved in growth,  
127 development and behavior in several animals, including mice and human<sup>26</sup>.  
128 Therefore, we focus on vitamin B12, which was recently also found to affect growth  
129 and development of *C. elegans*<sup>27</sup>, whereas nothing is known about vitamin B12  
130 affecting *C. elegans* behavior. We first analyzed if vitamin B12 supplementation was  
131 sufficient to affect the expression of the *Ppa-acs-19.1* sensor and determined the  
132 required concentration for this. Supplementation of an *E. coli* diet with 500nM vitamin  
133 B12 resulted in the absence of *Ppa-acs-19.1* expression with no adverse effects to  
134 the health of wild-type animals (fig. S3A). Additionally, this vitamin B12 concentration  
135 abolished *Ppa-acs-19.1* expression on *N.lin.*LE124 *CbiQ::Tn5* mutants (fig. S3B).  
136 Subsequently, we analyzed if this supplementation was also sufficient to enhance the  
137 predatory behaviors. Indeed, supplementation with 500nM vitamin B12 rescued the  
138 vitamin B12-deficient *N. lin.* LE124 *CbiQ* mutant and similarly, increased surplus-  
139 killing behavior on an *E. coli* diet (Fig. 3A and B). These results demonstrate that  
140 vitamin B12 is an important micronutrient involved in complex behaviors in  
141 nematodes.

142 Studies by Walhout and co-workers in *C. elegans* showed that developmental  
143 acceleration under a *Comamonas aq.* DA1877 diet was also due to vitamin B12<sup>27</sup>.  
144 Given the similarities of the *C. elegans* developmental response to *Comamonas*  
145 DA1877 and the behavioral response of *P. pacificus* to *N. lin.* LE124, we compared  
146 the effect of both bacteria on development and behavior. Indeed, *Comamonas*  
147 DA1877 as well as *N. lin.* LE124 induced developmental acceleration of *C. elegans*  
148 and *P. pacificus* (Fig. 3C). Similarly, both bacteria enhanced predatory behaviors of  
149 *P. pacificus* (Fig. 3D). Thus, the differential effect of bacterial diet on nematode  
150 development and behavior might often be due to the uneven distribution of vitamin  
151 B12 biosynthesis capabilities of bacteria.

152 In many animals and humans, vitamin B12 is a co-factor for two enzymes in  
153 different pathways (fig. S4A). Methionine-synthase (MS) converts homocysteine to  
154 methionine in the cytosolic methionine/S-adenosylmethionine (SAM) cycle and in *C.*  
155 *elegans* is encoded by the *metr-1* gene. The second enzyme, methylmalonyl  
156 coenzyme A (CoA) mutase, converts methylmalonyl-CoA to succinyl-CoA in  
157 mitochondria and is encoded by the *mce-1* gene in *C. elegans*. In humans, vitamin  
158 B12 deficiency causes methylmalonic aciduria and homocysteinemia resulting in  
159 devastating diseases<sup>28</sup>. To test if both pathways are required for increased killing  
160 behavior in *P. pacificus*, we generated CRISPR/Cas9-derived mutants in *Ppa-metr-1*  
161 and *Ppa-mce-1* (fig. S4B, C and D). Both mutants failed to respond to the  
162 supplementation of an *E. coli* diet with vitamin B12 (Fig. 4A). Given that SAM is a  
163 donor of methyl-groups for many different substrates including RNA, DNA, and  
164 proteins, we supplemented an *E. coli* diet of *P. pacificus* wild type and *Ppa-metr-1*  
165 mutant animals with methionine. In both cases, methionine supplementation resulted  
166 in enhanced killing behavior (Fig. 4B). Thus, both vitamin B12-dependent pathways  
167 seem to be involved in *P. pacificus* predatory behaviors.

168 The experiments described above indicate crucial roles of bacterial derived  
169 vitamin B12 for the development and behavior of both *P. pacificus* and *C. elegans*.  
170 As these nematodes are estimated to have diverged roughly 100 Mya<sup>29</sup>, we next  
171 tested how prevalent the effects of vitamin B12 are on the development and  
172 physiology of other nematodes, including more distantly related species and  
173 representatives that live in diverse ecological settings (supplementary table 1). We  
174 grew six nematode species of four major taxonomic clades on a vitamin B12  
175 supplemented diet and measured the effects on their development and growth by  
176 quantifying the total worm volume of young adults. In all species tested, we found a  
177 significant increase in worm volume (Fig. 4C and D). This included the facultative  
178 parasite *Parastrongyloides trichosuri* and the entomopathogenic nematode

179 *Steinernema carpocapsae*. We found the strongest effect on the large free-living  
180 nematode *Allodiplogaster sudhausi* that nearly doubled its volume on a vitamin B12  
181 supplemented diet (Fig. 4D). Where possible, we also investigated the effects on  
182 developmental speed. Similar to the increase in body size, vitamin B12  
183 supplementation accelerated the development of *Rhabditophanes* sp. and *A.*  
184 *sudhausi* (fig. S4E and F). Taken together, these results demonstrate important  
185 physiological and developmental functions of vitamin B12 that are shared across  
186 many nematode species.

187 Our study identified a novel role for nematode-associated microbiota in  
188 modulating the complex behavioral trait of predation and therefore, demonstrates a  
189 connection between the microbial diet and the nervous system in nematodes.  
190 Diverse bacterial species had different effects on the predatory behavioral state with  
191 some adversely influencing predation while others enhanced the predatory  
192 behaviors. The greatest enhancement in predatory behaviors was observed when *P.*  
193 *pacificus* was fed upon *Novosphingobium* with this increase in killing influenced by  
194 bacterial derived vitamin B12. Additionally, we have revealed a more general,  
195 conserved role for vitamin B12 in nematode development and growth. Previous  
196 studies have shown vitamin B12 to be essential for *C. elegans* development with  
197 infertility, growth retardation and a reduction in life-span observed in animals deficient  
198 in vitamin B12<sup>27,30,31</sup>. In contrast, behavioral effects have not been reported and  
199 similarly, mechanisms of vitamin B12 deficiency in humans that result in  
200 neuropathies are currently unknown. It is important to note that the modulation of  
201 predation and surplus-killing in *P. pacificus* requires both vitamin B12-dependent  
202 pathways. Therefore, we speculate that the influence of vitamin B12 on these  
203 behaviors is multifactorial and might well involve several factors. Specifically, the  
204 SAM pathway feeds into the methylation of DNA, RNA and proteins, but also lipids  
205 and neurotransmitters (fig. S4a). Thus, the presence of vitamin B12 might act  
206 through multiple downstream factors, but how it stimulates these effects has yet to be  
207 discovered. Importantly however, several neural circuits and neurotransmitter  
208 systems of *P. pacificus* have been investigated<sup>16,32-34</sup>. Therefore, future studies can  
209 reveal the cellular and molecular foci of vitamin B12-dependence and the influence of  
210 the microbiota on nematode predatory behaviors.

## 211 **METHODS**

### 212 **Nematode and Bacterial Strains**

213 A list of all nematode and bacterial species and strains can be found in key resources  
214 table.

### 215 **Bacterial Culture Conditions**

216 All bacterial strains and mutants were grown overnight in LB (Lysogeny broth)  
217 supplemented with 50µg/ml kanamycin where required. Bacteria were grown at 30°  
218 C or 37° C depending on the species and 6 cm nematode growth medium (NGM)  
219 plates were seeded with 50µl bacterial overnight cultures and were incubated for two  
220 days.

### 221 **Nematode Culture Conditions**

222 *P. pacificus*, *C. elegans*, *Rhabditophanes* sp. KR302 and *A. sudhausi* were grown  
223 under standard nematode growth conditions on NGM plates seeded with *Escherichia*  
224 *coli* OP50. Egg cultures were obtained by treating healthy gravid adults with alkaline  
225 hypochlorite (bleaching) and were maintained and raised at 20° C on NGM plates.  
226 The free-living generation of *Parastrongyloides trichosuri* was cultured as described  
227 in Grant et al (2006)<sup>35</sup>. Briefly, to maintain the *P. trichosuri* free-living generation in  
228 culture, *E. coli* OP50-spotted NGM plates were incubated for two days at room  
229 temperature (RT). Autoclaved rabbit feces were lightly broken and placed on the  
230 spotted NGM plate along with *P. trichosuri* animals. Additional *E. coli* OP50  
231 (supplemented with/without vitamin B12) was subsequently added to the dry rabbit  
232 feces. The entomopathogenic nematode *Steinernema carpocapsae* was grown on its  
233 symbiotic bacterium *Xenorhabdus nematophila*. Symbiotic bacteria were inoculated  
234 in LB and incubated at 25°C overnight, 300µl from overnight cultures were spotted to  
235 NGM plates (supplemented with/without vitamin B12) and incubated for 1 day at RT.  
236 *S. carpocapsae* nematodes were transferred to their respective symbiotic bacterial  
237 plates and subsequently grown at 20° C.



238 **Mouth-form phenotyping**

239 Mouth-form phenotyping was performed as previously reported<sup>6,33</sup>. In brief, axenic  
240 worm eggs were obtained by treating healthy gravid *P. pacificus* adults with alkaline  
241 hypochlorite, which were subsequently maintained on the test bacteria strains or  
242 mutants for at least two generations. Synchronized J4 larvae were picked onto NGM  
243 plates with the same test bacteria and roughly 12 hours (hrs) later, worms became  
244 young adults. NGM plates with synchronized young adults were placed onto a  
245 stereomicroscope with high magnification (150X). The eurystomatous (Eu) mouth  
246 form was determined by the presence of a wide mouth, whereas the stenostomatous  
247 (St) forms were determined by a narrow mouth. Eu young adult worms were picked  
248 for predation assays.

249 **Predation assays:**

250 We used two types of predation assays as described below.

251 **Corpse assays**

252 Corpse assays facilitated rapid quantification of predatory behavior and were  
253 conducted as previously described<sup>6,10,33</sup>. Briefly, in order to generate substantial *C.*  
254 *elegans* larvae for use as prey, cultures were maintained on *E. coli* OP50 bacteria  
255 until freshly starved resulting in an abundance of young larvae. These plates were  
256 washed with M9 buffer, passed through two Millipore 20µm filters and centrifuged at  
257 377x g to form a concentrated larval pellet. Excess buffer was removed and 1µl of  
258 worm pellet was deposited onto a 6 cm NGM unseeded assay plates. This resulted in  
259 roughly 3000 prey larvae on each assay plate. Assay plates were left for a minimum  
260 of one hour (h) to allow larvae to distribute evenly over the plate. Young adult *P.*  
261 *pacificus* predators were screened for the predatory Eu mouth form and transferred  
262 to empty NGM plates for 30 minutes (min) to remove any excess bacteria from their  
263 bodies. Subsequently, five *P. pacificus* nematodes were added to each assay plate.  
264 Predators were permitted to feed on the prey for two hrs before removal and the  
265 plate was subsequently screened for the presence of larval corpses which were  
266 identified by the absence of motility coinciding with obvious morphological defects  
267 including leaking innards or missing worm fragments. Each assay was replicated  $\geq 5$   
268 times. When post-feeding size measurement was required, predatory animals were  
269 picked to NGM plates containing no bacteria and measurements were taken using  
270 the Wormsizer plug in for Image J/Fiji<sup>36</sup>. See below for Wormsizer experimental  
271 details.

## 272 **Bite assays**

273 Bite assays provide a more detailed and thorough analysis of the specific interactions  
274 associated with predatory behaviors. Bite assays were conducted as previously  
275 described<sup>6,10</sup>. Briefly, substantial *C. elegans* prey was generated by maintaining *C.*  
276 *elegans* cultures on *E. coli* OP50 bacteria until freshly starved resulting in an  
277 abundance of young larvae. These plates were washed with M9 buffer, passed  
278 through two Millipore 20µm filters and centrifuged at 377x g to form a concentrated  
279 larval pellet. Excess buffer was removed and 1µl of worm pellet was deposited onto a  
280 6 cm NGM unseeded assay plate. This resulted in roughly 3000 prey larvae on each  
281 assay plate. Assay plates were left for a minimum of one h to allow larvae to  
282 distribute evenly over the plate. Young adult *P. pacificus* predators were screened for  
283 the appropriate predatory Eu mouth morph and transferred to empty NGM plates for  
284 30 min to remove any excess bacteria from their bodies. A single predator was  
285 placed on to the assay plate and allowed to recover for 20 min. After recovery, the  
286 predatory animal was directly observed under a light stereomicroscope for 10 min  
287 and the number of bites, successful bites and feeding events quantified. “Bites” were  
288 characterized by a switch to the slower predatory pharyngeal pumping rhythms  
289 previously described<sup>6,33</sup> coinciding with a restriction in movement of the prey.  
290 “Successful bites” were characterized by successful rupturing of the prey cuticle  
291 resulting in sufficient damage to cause the innards to leak from the wound. “Feeding”  
292 was characterized by consumption of the prey through either the observation of  
293 prolonged predatory feeding rhythms once the predator had successfully grasped its  
294 prey, or alternatively, observation of the faster bacterial associated feeding rhythms  
295 at the site of a puncture wound. In these assays, no distinction was made as to  
296 whether the predatory behavior events were against live prey or against recently  
297 killed or wounded animals. Indeed, predators were occasionally observed repeatedly  
298 biting the same dying or dead larvae and each contact was quantified as a distinct  
299 predatory event. Each assay was conducted with 10 different animals.

### 300 **Pharyngeal pumping analysis**

301 *P. pacificus* worms were maintained on 6cm NGM agar plates and fed on the  
302 appropriate test bacterial strains prior to assaying. Young adults were transferred  
303 onto assay plates and allowed to recover for 15 min from the stress of being  
304 transferred. Worms were observed on a Zeiss microscope at 40-63X magnifications,  
305 with a high-speed camera and pharyngeal pumping was recorded for 15 seconds, at  
306 50 Hz in at least 20 animals to ensure accurate quantification. The recorded movies  
307 were replayed at the desired speed to count individual pumps as previously  
308 described<sup>6</sup>.

### 309 ***E. coli* OP50 supplementation with *Novosphingobium* L76 supernatant**

310 *E. coli* OP50 and *Novosphingobium* L76 were grown overnight in LB at 37° C and  
311 30° C, respectively. 5ml overnight cultures of each bacteria were grown until they  
312 measured an OD<sub>600</sub> 1. Bacterial cultures were centrifuged at 10000 rpm, RT for 5 min  
313 and supernatants were isolated by filtering with 5µm filters. The *E. coli* OP50 pellet  
314 was re-suspended with 5ml *Novosphingobium* L76 supernatant. 300µl of the *E. coli*  
315 OP50 with *Novosphingobium* L76 supernatant was subsequently spotted to 6 cm  
316 NGM plates. OP50 pellet with OP50 supernatant and additionally, *Novosphingobium*  
317 L76 were also spotted to 6 cm NGM plates as controls. Spotted NGM plates were  
318 ready for assay after two days of incubation. Freshly bleached eggs from well-grown  
319 *P. pacificus* cultures were then transferred onto assay plates and worms were  
320 transferred to new assay plates two days later. Worms were grown until young adult  
321 stage and synchronized young adults were picked and assessed via corpse assays.

### 322 **Mixing Bacterial Diets**

323 Liquid cultures of *E. coli* OP50 and *Novosphingobium* L76 were grown in LB at 37° C  
324 and 30° C, respectively. Bacterial cultures were diluted to the same OD<sub>600</sub> and mixed  
325 in ratios 1/10, 1/100 and 1/1000. Bacterial suspensions were spread onto peptone-  
326 free NGM plates to minimize bacterial growth and plates were briefly air dried in a  
327 sterile hood. Bleached *P. pacificus* eggs were added to the plates and worms were  
328 allowed to grow until young adult stage; synchronized young adults were then picked  
329 and assessed via corpse assays.

### 330 **Switching bacterial diet**

331 Overnight cultures of *E. coli*\_OP50 and *Novosphingobium* L76 were spread to NGM  
332 plates and incubated at RT for two days. Subsequently, bleached *P. pacificus* eggs  
333 were added to the *E. coli* OP50 plates. Worms were transferred from these *E. coli*\_  
334 OP50 plates to *Novosphingobium* L76 at specific developmental stages, L2, L3 and  
335 L4, respectively, and were allowed to develop into young adult stage on  
336 *Novosphingobium* L76. Worms fed with *E. coli*\_OP50 or *Novosphingobium* L76 from  
337 egg to young adult stage were used as controls. Synchronized young adults were  
338 then picked and assessed via corpse assays.

### 339 **RNA sequencing**

340 Bacterial strains were grown in LB overnight and spotted to 6 cm NGM plates.  
341 Starting from bleached eggs *P. pacificus* nematodes were grown on bacteria for at  
342 least two generations and 50 young adults were picked for RNA isolation. Total RNA  
343 was extracted using Direct-Zol RNA Mini prep kit (Zymo Research) according to the  
344 manufacturer's guidelines. RNA libraries were prepared by following Truseq RNA  
345 library prep kit according to the manufacturer's guidelines from 1µg of total RNA in  
346 each sample (Illumina Company). Libraries were quantified using a combination of  
347 Qubit and Bioanalyzer (Agilent Technologies) and normalized to 2.5nM. Samples  
348 were subsequently sequenced as 150 bp paired end reads on multiplexed lanes of  
349 an Illumina HiSeq3000 (Illumina Inc). Raw reads have been uploaded to the  
350 European Nucleotide archive under the study accession PRJEB33410.

### 351 **Analysis of RNA-seq data**

352 The software TopHat (version:2.0.14) was used to align raw reads against the *P.*  
353 *pacificus* reference genome (pristionchus.org, version: Hybrid1) and tests for  
354 differential expression were performed by Cuffdiff (version: 2.2.1)<sup>37</sup>. Genes with an  
355 FDR-corrected p-value < 0.05 were considered as significantly differentially  
356 expressed. For up and downregulated genes, the most significantly enriched  
357 metabolic pathways were identified as described previously<sup>12</sup>.

### 358 **Generation of transgenic lines**

359 We selected the genes *Ppa-stdh-1* and *Ppa-acs-19.1* to generate transcriptional  
360 reporters and established transgenic lines necessary for their use as dietary sensors.  
361 For *Ppa-stdh-1*, a 2.3 kb interval encompassing the upstream region and the first two  
362 exons was amplified. For *Ppa-acs-19.1*, a 1.4 kb region upstream of the first  
363 predicted exon was amplified. These promoters were fused to TurboRFP (Evrogen),  
364 together with the 3' UTR sequence of the gene *Ppa-rpl-23* using the following  
365 overlapping primers

366 *Ppa-stdh-1* - F:

367 5'-GCCAAGCTTGCATGCCTGCACATGCTATGGAGCGTAGC-3';

368 *Ppa-stdh-1* - R:

369 5'-CTGAAAAAAAAAACCCAAGCTTGGGTCCCGAAGACGACGTTGTAGAC-3';

370 *Ppa-acs-19.1* -F

371 5'-GGATCCCGTCGACCTGCAGGCATG-3';

372 *Ppa-acs-19.1* –

373 R 5'-ATGAGCGAGCTGATCAAG-3';

374 *TurboRFP* -F

375 5'- TGCATGCCTGCAGGTCGACGGGATCCGCCATCACTATGCATTGCTG-3' and

376 *TurboRFP*- R

377 5'-TCCTTGATCAGCTCGCTCATCTGAACCAGCAAGGGCGATAG-3'.

378 PCR fragments were assembled using Gibson assembly kit (NEB) and verified by  
379 Sanger sequencing. The *Ppa-stdh-1::RFP* and *Ppa-acs-19.1::RFP* constructs were  
380 amplified with the addition of restriction sites (XmaI and PstI) for subsequent  
381 digestion. To form stable lines via the formation of complex arrays, the expression  
382 construct The *Ppa-stdh-1::RFP* was digested with PstI and 5ng/μl of this, co-injected  
383 into the germlines of young adult *P. pacificus* worms with the marker *Ppa-egl-*  
384 *20::Venus* (10 ng/μl), and genomic carrier DNA (60ng/μl), also digested with PstI<sup>38</sup>.  
385 For the *Ppa-acs-19.1::RFP* construct, 10ng/μl of the construct cut with PstI, was  
386 injected with the marker *Ppa-egl-20::RFP* (10ng/μl), and genomic carrier DNA (60ng/  
387 μl) also cut with PstI. At least two independent lines were obtained from  
388 microinjections for both transgenes.

### 389 **Transposon mutagenesis of bacteria**

390 To generate electro-competent cells of *N. lindaniclasticum* LE124 for electroporation,  
391 *N. lindaniclasticum* LE124 cells were grown in LB overnight at 30° C. These  
392 overnight cultures were diluted (1:10 vol/vol) and incubated for  $\cong$  6 h to reach early  
393 log phase (optical density [OD] at 600nm of 0.3). The culture was centrifuged at 4° C,  
394 10,000 rpm for 10 min before being washed once with ice-cold distilled water and  
395 two times with ice-cold 10% glycerol. After the final washing step, cells were  
396 centrifuged and the pellet re-suspended with  $\cong$  1 ml 10% glycerol before 50 $\mu$ l  
397 aliquots were distributed to 1.5 ml Eppendorf tubes. The cells in glycerol were  
398 electroporated with the EZ-Tn5 R6K*YoriI*/KAN-2>Tnp transposon (Epicentre, Madison  
399 WI) using an Eppendorf Electroporator 2510 at 2.5 kV yielding around 5 ms. After  
400 electroporation, the sample was immediately mixed with SOC (super optimal broth  
401 with catabolite repression) medium and incubated at 30° C for two hrs, the culture  
402 was then plated on LB agar medium supplemented with 50 $\mu$ g/ml of kanamycin.

### 403 **Bacterial transposon mutagenesis library preparation**

404 After two days incubation of the bacteria at 30° C, 10 colonies were randomly  
405 selected, picked and a PCR carried out together with Sanger sequencing to confirm  
406 the integration of the transposon into the *N. lindaniclasticum* LE124 genome using  
407 the primers

408 KAN-2 FP-1 - F

409 5'-ACCTACAACAAAGCTCTCATCAACC-3' and

410 R6KAN-2 RP-1 - R

411 5'-CTACCCTGTGGAACACCTACATCT-3'.

412

413 After successful confirmation of the bacterial transposon mutagenesis, around 4500  
414 single mutant colonies were picked and inoculated to 96 well plates in 160 $\mu$ l LB  
415 supplemented with 50  $\mu$ g/ml of kanamycin. Overnight cultures of all mutants were  
416 mixed with 160 $\mu$ l 50% glycerol and frozen at -80°C.

### 417 **Transposon mutant library screening using dietary sensors**

418 Transposon mutants were inoculated into 96 well plates in 180µl LB supplemented  
419 with 50µg/ml of kanamycin. After overnight growth at 30° C, 20µl from the mutant  
420 cultures were spotted to 24-well NGM plates. Bacterial mutant strains were incubated  
421 for two days and eggs of *P. pacificus* RS3271 (*Ppa-stdh-1::RFP*) or *P. pacificus*  
422 RS3379 (*Ppa-acs-19.1::RFP*) were bleached and filtered with Millipore 120.0µm  
423 filters to reduce the amount of adult worm carcasses. Around 50-100 bleached eggs  
424 were spotted to each well with mutant bacteria; *E. coli* OP50 and *N. lindaniclasticum*  
425 LE124 wild type strain were used as controls. Fluorescent worms were grown on the  
426 bacterial strains until they became young adults. The *Ppa-stdh-1::RFP* line was  
427 screened for decreased RFP expression while the *Ppa-acs-19.1::RFP* line was  
428 screened for increased RFP expression. Initial positive results were re-screened at  
429 least three times to confirm changes in gene expression.

#### 430 **Analysis of Transposon Mutant Sequencing Data**

431 Raw reads were aligned against *N. lindaniclasticum* LE124 reference genome and  
432 transposon sequence by the BWA aln and samse programs (version 0.7.12-r1039)<sup>39</sup>.  
433 The generated sam files were screened for read pairs where one read aligned to the  
434 transposon sequence and the second read was unmapped. The location of the  
435 affected gene was identified by realignment of the unmapped second read against  
436 the *N. lindaniclasticum* LE124 reference with the help of blastn (version: 2.6.0)<sup>40</sup>.

#### 437 **Generation of CRISPR-induced mutants of *Ppa-metr-1* and *Ppa-mce-1***

438 We generated mutant alleles for *Ppa-metr-1* and *Ppa-mce-1* using the CRISPR/Cas9  
439 technique following the protocol described previously (Witte et al, 2015). crRNAs  
440 were synthesized by Integrated DNA Technologies and fused to tracrRNA (also  
441 Integrated DNA Technologies) at 95° C for five min before the addition of the Cas9  
442 endonuclease (New England Biolab). After a further five min incubation at RT, TE  
443 buffer was added to a final concentration of 18.1µM for the sgRNA and 2.5µM for  
444 Cas9. Around 20 young adults were injected; eggs from injected P0s were recovered  
445 up to 16 hrs post injection. After hatching and two days of growth these F1 were  
446 picked onto individual plates until they had also developed and laid eggs. The  
447 genotype of the F1 animals was subsequently analyzed via Sanger sequencing and  
448 mutations identified and isolated in homozygosity.



#### 449 **Phylogenetic Analysis**

450 For two fatty acid metabolism related genes with differential expression between the  
451 bacterial diets, we retrieved homologs by BLASTP searches against WormBase  
452 (version: WS270) and pristonchus.org (version: TAU2011). Homologous protein  
453 sequences from *C. elegans* and *P. pacificus* were aligned by MUSCLE (version:  
454 3.8.31)<sup>41</sup> and maximum likelihood trees were generated with the help of the  
455 phangorn package in R (version: 3.5.3, parameters: model="LG", optNni=TRUE,  
456 optBf=TRUE, optInv=TRUE)<sup>42</sup>. To assess the robustness of the resulting trees, 100  
457 bootstrap pseudoreplicates were calculated. For two *C. elegans* candidate genes  
458 involved in the Vitamin B12 pathway, one-to-one orthologs in *P. pacificus* could  
459 directly be retrieved from BLASTP searches against WormBase (version: WS270):  
460 *Ppa-metr-1* (PPA25255) and *Ppa-mce-1* (PPA39850). One-to-one orthology was  
461 confirmed by phylogenetic analysis.

#### 462 **Metabolite supplementation**

463 Methylcobalamin (Vitamin B12 CAS Number 13422-55-4) and L-methionine (CAS  
464 Number 63-68-3) were purchased from Sigma and dissolved in water at the highest  
465 possible soluble concentrations to prepare stock solution. A methylcobalamin stock  
466 was prepared fresh before use in each experiment. Metabolite solutions were mixed  
467 with NGM agar at the required concentration just before pouring the 6 cm plates.  
468 Plates were allowed to dry at RT for two days and then spotted with *E. coli* OP50.

#### 469 ***Ppa-acs-19.1::RFP* gene expression screening on metabolite supplemented 470 plates**

471 We used *Ppa-acs-19.1::RFP* transgenic animals to determine working concentrations  
472 of metabolite supplementations. Bleached *Ppa-acs-19.1::RFP* transgenic eggs were  
473 transferred to metabolite-supplemented plates, which were prepared as described  
474 above. *Ppa-acs-19.1::RFP* positive young adults were screened for differences in  
475 gene expression in comparison to control animals grown on a *E. coli* OP50 and *N.*  
476 *lindaniclasticum* LE124 diet without metabolite supplementation.

#### 477 **Imaging transgenic reporter lines**

478 Eggs of transgenic reporter lines *Ppa-acs-19.1::RFP* and *Ppa-stdh-1::RFP* were  
479 bleached and transferred to bacteria plates that were prepared as described. Three  
480 ml of 2% agar was prepared and a drop (150µl) of 1 M sodium azide (NaN<sub>3</sub>) was  
481 added and mixed with agar to immobilize the worms. Around 200-µl agar was  
482 dropped on microscope slide and young adult transgenic worms were placed on the  
483 agar. Images of the worms were taken with 10X objective of ZEISS Imager Z1  
484 equipped with the AxioCam camera using ZEN imaging software. The same  
485 exposure time was applied to all images.

#### 486 **Vitamin B12 (Methylcobalamin) supplementation assays**

487 Vitamin B12-supplemented plates were prepared as described above. *P. pacificus*,  
488 *C. elegans*, *Rhabditophanes* sp. KR3021, *A. sudhausi* SB413, as well as *Ppa-metr-1*  
489 (*tu1436*, *tu1436*) and *Ppa-mce-1* (*tu1433*, *tu1434* and *tu1435*) mutant animals were  
490 grown on supplemented plates from egg to young adult stage and subsequently used  
491 for i) predatory assays, ii) worm size measurements and iii) developmental assays.  
492 For supplementation experiments with free-living *P. trichosuri*, J2 larvae were washed  
493 five times with M9 medium and filtered with Millipore 20.0µm filters before being  
494 soaked in PBS supplemented with 100µg/ml penicillin and ampicillin for one h to  
495 avoid contamination. J2 larvae were washed a final time with PBS containing no  
496 antibiotics and transferred to assay plates. For *S. carpocapsae*, J2 larvae were  
497 washed with M9 medium and filtered with Millipore 20.0µm filters before transferring  
498 to NGM plates supplemented with/without 500nM vitamin B12.

#### 499 **Worm size measurement**

500 *P. pacificus*, *C. elegans*, *Rhabditophanes* sp., *P. trichosuri*, *A. sudhausi* and *S.*  
501 *carpocapsae* synchronized young adults were transferred from assay plates to NGM  
502 plates without bacteria. Bright field images of the worms were taken using 0.63x  
503 objective of ZEISS SteREO Discovery V12 using the AxioCam camera. Images were  
504 analyzed using the Wormsizer plug in for Image J/Fiji<sup>36</sup>. Wormsizer detects and  
505 measures the volume of the worms.

## 506 **Development rate assays**

507 For development rate assays, *P. pacificus*, *C. elegans*, *Rhabditophanes sp.* and *A.*  
508 *sudhausi* were grown on OP50 at 20° C. Nematode eggs were bleached, washed  
509 with M9 several times and allowed to hatch in M9 medium for 20 hrs in the absence  
510 of food to cause J2 arrest. Once synchronized, J2 larvae were filtered through two  
511 Millipore 20.0µm filters and around 30-60 J2 animals were transferred to NGM plates  
512 (supplemented with/without 500nM vitamin B12) spotted in 50µl of the desired test  
513 bacterial strain. Nematodes were subsequently allowed to develop on test bacteria  
514 for the following time periods: *P. pacificus* 57 hrs at 20° C, *C. elegans* and  
515 *Rhabditophanes sp.* 45 hrs at 20° C and *A. sudhausi* for 144 hrs at RT. Following  
516 this, worms were categorized into groups based on the development of the vulva and  
517 germ line using 0.63x objective of ZEISS SteREO Discovery V12 following previously  
518 established protocols<sup>27</sup>.

## 519 **Statistical analysis**

520 Statistical calculations (mean, SEM, and t test) were performed by using R studio  
521 software. Pairwise t-tests with Benjamini-Hochberg multiple testing correction were  
522 applied when testing the effect of a single treatment or mutant against one single  
523 control sample. For tests across different groups (e.g. treatments, mutants,  
524 behaviors), Tukey-HSD test was applied. Significance is designated between two  
525 samples according to the following scale: 0 '\*\*\*' 0.001 '\*\*' 0.01 '\*' 0.05 'n.s' 0.1 'n.s' 1.

## 526 **ACKNOWLEDGMENTS**

527 We thank Dr. A. Streit and R. Ehlers for *Parastrongyloides* and *Steinernema* material,  
528 respectively, and members of the Sommer lab for discussion. This work was funded  
529 by the Max Planck Society.

530 **AUTHOR CONTRIBUTIONS**

531 N.A. and J.W.L. performed all behavioral experiments. W.R. performed the RNA-seq  
532 experiments, H.W., N.A. and J.W.L. generated dietary sensor lines and CRISPR-  
533 induced mutants. Bioinformatic analysis was performed by W-S.L. and C.R. All  
534 experiments were designed by N.A., C.R., J.W.L. and R.J.S.

535 **DECLARATION OF INTERESTS**

536 Authors declare no competing interests.

537 **DATA AND MATERIAL AVAILABILITY**

538 RNA-seq data has been deposited at the European Nucleotide Archive under the  
539 study accession PRJEB33410. All other data is available in the main text or the  
540 supplementary materials.

541 **REFERENCES**

- 542 1. Kamareddine, L., Robins, W. P., Berkey, C. D., Mekalanos, J. J. & Watnick, P. I.  
543 The Drosophila Immune Deficiency Pathway Modulates Enteroendocrine Function  
544 and Host Metabolism. *Cell Metabolism* **28**, 449-462.e5 (2018).
- 545 2. Thaïss, C. A., Zmora, N., Levy, M. & Elinav, E. The microbiome and innate  
546 immunity. *Nature* **535**, 65–74 (2016).
- 547 3. Kau, A. L., Ahern, P. P., Griffin, N. W., Goodman, A. L. & Gordon, J. I. Human  
548 nutrition, the gut microbiome and the immune system. *Nature* **474**, 327–336 (2011).
- 549 4. Sommer, R. J., Carta, L. K., Kim, S. Y. & Sternberg, P. W. Morphological, genetic  
550 and molecular description of *Pristionchus pacificus* sp. n. (Nematoda:  
551 Neodiplogastridae). *Fundamental and Applied Nematology* **19**, 511–521 (1996).
- 552 5. Sommer, R. J. Integrative evolutionary biology and mechanistic approaches in  
553 comparative biology. In: *Pristionchus pacificus* - a nematode model for comparative  
554 and evolutionary biology (Ed.: R. J. Sommer). Brill, Leiden, pp. 19-41 (2015)
- 555 6. Wilecki, M., Lightfoot, J. W., Susoy, V. & Sommer, R. J. Predatory feeding  
556 behaviour in *Pristionchus* nematodes is dependent on phenotypic plasticity and  
557 induced by serotonin. *Journal of Experimental Biology* **218**, 1306–1313 (2015).
- 558 7. Ragsdale, E. J., Müller, M. R., Rödelsperger, C. & Sommer, R. J. XA  
559 developmental switch coupled to the evolution of plasticity acts through a sulfatase.  
560 *Cell* **155**, 922 (2013).
- 561 8. Serobyán, V. *et al.* Chromatin remodelling and antisense-mediated up-regulation  
562 of the developmental switch gene *eud-1* control predatory feeding plasticity. *Nature*  
563 *Communications* **7**, (2016).
- 564 9. Sieriebriennikov, B. *et al.* A Developmental Switch Generating Phenotypic  
565 Plasticity Is Part of a Conserved Multi-gene Locus. *Cell Reports* **23**, 2835-2843.e4  
566 (2018).
- 567 10. Lightfoot, J. W. *et al.* Small peptide-mediated self-recognition prevents  
568 cannibalism in predatory nematodes. *Science* **364**, 86–89 (2019).
- 569 11. Bento, G., Ogawa, A. & Sommer, R. J. Co-option of the hormone-signalling  
570 module dafachronic acid-DAF-12 in nematode evolution. *Nature* **466**, 494–497  
571 (2010).
- 572 12. Sanghvi, G. V. *et al.* Life history responses and gene expression profiles of the  
573 nematode *Pristionchus pacificus* cultured on *Cryptococcus* yeasts. *PLoS ONE* **11**,  
574 (2016).
- 575 13. Werner, M. S. *et al.* Environmental influence on *Pristionchus pacificus* mouth  
576 form through different culture methods. *Scientific Reports* **7**, (2017).
- 577 14. Kruuk, H. Surplus killing by carnivores. *Journal of Zoology* **166**, 233–244 (1972).

- 578 15. Nunn, G. L., Klem, D., Kimmel, T. & Merriman, T. Surplus killing and caching by  
579 American kestrels (*Falco sparverius*). *Animal Behaviour* **24**, 759–763 (1976).
- 580 16. Mueller, D. L. & Hastings, B. C. A clarification of “surplus killing.” *Animal*  
581 *Behaviour* **25**, 1065 (1977).
- 582 17. Zimmermann, B., Sand, H., Wabakken, P., Liberg, O. & Andreassen, H. P.  
583 Predator-dependent functional response in wolves: From food limitation to surplus  
584 killing. *Journal of Animal Ecology* **84**, 102–112 (2015).
- 585 18. Reimchen, T. E. Some ecological and evolutionary aspects of bear-salmon  
586 interactions in coastal British Columbia. *Canadian Journal of Zoology* **78**, 448–457  
587 (2000).
- 588 19. Gaydos, J. K., Raverty, S., Baird, R. W. & Osborne, R. W. Suspected surplus  
589 killing of harbor seal pups by killer whales. *Northwestern Naturalist* **86**, 150–154  
590 (2005).
- 591 20. Veselý, L. *et al.* Effects of prey density, temperature and predator diversity on  
592 nonconsumptive predator-driven mortality in a freshwater food web. *Scientific*  
593 *Reports* **7**, (2017).
- 594 21. Maupin, J. L. Superfluous killing in spiders: a consequence of adaptation to food-  
595 limited environments? *Behavioral Ecology* **12**, 569–576 (2001).
- 596 22. Lounibos, L. P., Makhni, S., Alto, B. W. & Kesavaraju, B. Surplus killing by  
597 predatory larvae of *Corethrella appendiculata*: Prepupal timing and site-specific  
598 attack on mosquito prey. *Journal of Insect Behavior* **21**, 47–54 (2008).
- 599 23. Trubl, P., Blackmore, V. & Chadwick Johnson, J. Wasteful Killing in Urban Black  
600 Widows: Gluttony in Response to Food Abundance. *Ethology* **117**, 236–245 (2011).
- 601 24. Akduman, N., Rödelberger, C. & Sommer, R. J. Culture-based analysis of  
602 *Pristionchus*-associated microbiota from beetles and figs for studying nematode-  
603 bacterial interactions. *PLoS ONE* **13**, (2018).
- 604 25. Saxena, A. *et al.* Genome sequence of *Novosphingobium lindaniclasticum*  
605 LE124T, isolated from a hexachlorocyclohexane dumpsite. *Genome Announcements*  
606 **1**, (2013).
- 607 26. Yamada, K. in (eds. Sigel, A., Sigel, H. & Sigel, R. K. O.) 295–320 (Springer  
608 Netherlands, 2013). doi:10.1007/978-94-007-7500-8\_9
- 609 27. Watson, E. *et al.* Interspecies systems biology uncovers metabolites affecting *C.*  
610 *elegans* gene expression and life history traits. *Cell* **156**, 759–770 (2014).
- 611 28. Kumar, N. in *Handbook of Clinical Neurology* **120**, 915–926 (Elsevier B.V., 2014).
- 612 29. Prabh, N. *et al.* Deep taxon sampling reveals the evolutionary dynamics of novel  
613 gene families in *Pristionchus* nematodes. *Genome Research* **28**, 1664–1674 (2018).

- 614 30. Bito, T., Matsunaga, Y., Yabuta, Y., Kawano, T. & Watanabe, F. Vitamin B 12  
615 deficiency in *Caenorhabditis elegans* results in loss of fertility, extended life cycle,  
616 and reduced lifespan. *FEBS Open Bio* **3**, 112–117 (2013).
- 617 31. Na, H., Ponomarova, O., Giese, G. E. & Walhout, A. J. M. *C. elegans* MRP-5  
618 Exports Vitamin B12 from Mother to Offspring to Support Embryonic Development.  
619 *Cell Reports* **22**, 3126–3133 (2018).
- 620 32. Bumbarger, D. J., Riebesell, M., Rödelsperger, C. & Sommer, R. J. System-wide  
621 rewiring underlies behavioral differences in predatory and bacterial-feeding  
622 nematodes. *Cell* **152**, 109–119 (2013).
- 623 33. Okumura, M., Wilecki, M. & Sommer, R. J. Serotonin drives predatory feeding  
624 behavior via synchronous feeding rhythms in the nematode *Pristionchus pacificus*.  
625 *G3: Genes, Genomes, Genetics* **7**, 3745–3755 (2017).
- 626 34. Hong, R. L. *et al.* Evolution of neuronal anatomy and circuitry in two highly  
627 divergent nematode species. *eLife*, **8**, e47155 (2019). doi:10.7554/eLife.47155
- 628 35. Grant, W. N. *et al.* *Parastrongyloides trichosuri*, a nematode parasite of mammals  
629 that is uniquely suited to genetic analysis. *International Journal for Parasitology* **36**,  
630 453–466 (2006).
- 631 36. Moore, B. T., Jordan, J. M. & Baugh, L. R. WormSizer: High-throughput Analysis  
632 of Nematode Size and Shape. *PLoS ONE* **8**, (2013).
- 633 37. Trapnell, C. *et al.* Differential gene and transcript expression analysis of RNA-seq  
634 experiments with TopHat and Cufflinks. *Nature Protocols* **7**, 562–578 (2012).
- 635 38. Schlager, B., Wang, X., Braach, G. & Sommer, R. J. Molecular cloning of a  
636 dominant roller mutant and establishment of DNA-mediated transformation in the  
637 nematode *Pristionchus pacificus*. *Genesis* **47**, 300–304 (2009).
- 638 39. Li, H. & Durbin, R. Fast and accurate long-read alignment with Burrows-Wheeler  
639 transform. *Bioinformatics* **26**, 589–595 (2010).
- 640 40. Altschul, S. F., Gish, W., Miller, W., Myers, E. W. & Lipman, D. J. Basic local  
641 alignment search tool. *Journal of Molecular Biology* **215**, 403–410 (1990).
- 642 41. Edgar, R. C. MUSCLE: Multiple sequence alignment with high accuracy and high  
643 throughput. *Nucleic Acids Research* **32**, 1792–1797 (2004).
- 644 42. Schliep, K. P. phangorn: Phylogenetic analysis in R. *Bioinformatics* **27**, 592–593  
645 (2011).

## 646 FIGURE LEGENDS

### 647 **Figure 1. Bacterial diet modulates killing behavior in *P. pacificus***

648 (A) Eurystomatous (Eu) and stenostomatous (St) mouth forms. Eu worms are  
649 capable of predation and have a wide mouth with two teeth, while St worms feed on  
650 bacteria and have a narrower mouth with one tooth. (B) A predatory *P. pacificus*  
651 adult biting a *C. elegans* larvae. (C) Corpse assay of *P. pacificus* predators fed upon  
652 *C. elegans* larvae following growth on a variety of ecologically associated bacteria;  
653 five predators are fed prey for two hours for each assay.  $N = 5$  replicates for each  
654 assay. (D) Bite assay after growth on either an *E. coli* OP50 or *Novosphingobium*  
655 L76 diet to assess the effect on *P. pacificus* surplus-killing behavior. Numbers of  
656 bites, successful bites and feeding was quantified during a 10 min interval while fed  
657 upon *C. elegans* larvae. (E) A corpse assay of *P. pacificus* fed with *E. coli* OP50,  
658 *Novosphingobium* L76 or of *E. coli* OP50 with *Novosphingobium* L76 supernatant.  
659  $N=10$  replicates for each assay for (D) and (E).

### 660 **Figure 2. Bacterial diet influences gene expression in *P. pacificus***

661 (A) RNA-seq analysis of *P. pacificus* in response to a diet of *Novosphingobium* L76  
662 compared to *E. coli* OP50. The pathways with most significant enrichment (FDR-  
663 corrected  $P < 10^{-5}$ ) in downregulated and (B) upregulated genes are shown. (C) The  
664 dietary sensor *Ppa-acs-19.1::RFP* is highly expressed in ventral gland, hypodermal  
665 and intestinal cells following an *E. coli* OP50 diet, while a *Novosphingobium* L76 diet  
666 induces expression only in ventral gland cells. The co-injection marker *Ppa-egl-*  
667 *20::RFP* is expressed in the tail. (D) *Ppa-stdh-1::RFP* is expressed in the intestinal  
668 and hypodermal cells with expression strongly upregulated on *Novosphingobium* L76  
669 diet compared to an *E. coli* OP50 diet. (E) Expression of *Ppa-acs-19.1::RFP* dietary  
670 sensor after feeding on *N. lin.* LE124 transposon mutants with mutations in vitamin  
671 B12 (*N. lin.* LE124 *CbiQ::Tn5*), purine (*N. lin.* LE124 *PurH::Tn5*), pyrimidine  
672 biosynthesis (*N. lin.* LE124 *PryD::Tn5*) and nitrogen metabolism (*N. lin.* LE124  
673 *GlnD::Tn5*). Mutants increase the expression of the dietary sensor in comparison to a  
674 *N. lin.* LE124 wild-type diet. (F) Corpse assay of *P. pacificus* after feeding on various  
675 *N. lin.* LE124 mutants. There is decreased killing efficiency compared to a *N. lin.*  
676 LE124 wild type diet.  $N=10$  replicates for each assay.



677 **Figure 3. Vitamin B12 containing diet regulates surplus killing behavior and**  
678 **development.**

679 (A) Corpse assays showing effects of vitamin B12 supplementation on *P. pacificus*  
680 predation efficiency with *P. pacificus* fed on either *E. coli* OP50, *N. lin.* LE124, *N. lin.*  
681 LE124 *CbiQ::Tn5*, 500nM vitamin B12 supplemented *E. coli* OP50 or 500nM vitamin  
682 B12 supplemented *N. lin.* LE124 *CbiQ::Tn5* prior to assays. (B) Bite assays showing  
683 effects of vitamin B12 supplementation on *P. pacificus* killing behavior with *P.*  
684 *pacificus* fed on either *E. coli* OP50, *N. lin.* LE124, *N. lin.* LE124 *CbiQ::Tn5* ,500nM  
685 vitamin B12 supplemented *E. coli* OP50 or 500nM vitamin B12 supplemented *N. lin.*  
686 LE124 *CbiQ::Tn5* prior to assays. (C) Developmental staging of *C. elegans* and *P.*  
687 *pacificus* showing percentage of L3, early L4, mid L4, late L4 and young adults on  
688 plates after feeding with *E. coli* OP50, *Commamonas* DA18877 and *N. lin.* LE124 for  
689 either 45 hours (*C. elegans*) or 56 hours (*P. pacificus*). (D) Corpse assays of *P.*  
690 *pacificus* fed with *E. coli* OP50, *Commamonas* DA18877 and *N. lin.* LE124. N=10  
691 replicates for each assay in figure.

692 **Figure 4. Vitamin B12 influence on development is conserved in various**  
693 **nematodes.**

694 (A) Corpse assays of *P. pacificus* wild-type (PS312) and mutant animals defective in  
695 vitamin B12-dependent pathways *Ppa-metr-1* and *Ppa-mce-1* fed with *E. coli* OP50  
696 supplemented with/without 500nM vitamin B12. (B) Corpse assays of PS312 and  
697 *Ppa-metr-1* fed with *E. coli* OP50 supplemented with/without 10mM methionine.  
698 N=10 replicates for each assay. (C) and (D) Comparative volume measurement of *C.*  
699 *elegans*, *P. pacificus*, *Parastrongyloides trichosuri*, *Rhabditophanes sp.*,  
700 *Steinernema carpocapsae* and *Allodiplogaster sudhausi* after growing on bacterial  
701 plates supplemented with vitamin B12 versus non-supplemented plates. N=60 for  
702 each assay.

## 703 SUPPLEMENTARY FIGURE LEGENDS

### 704 **Figure S1. Bacterial diet affects predatory behavior in *P. pacificus*.**

705 (A) Mouth form ratio of *P. pacificus* PS312 after feeding with 25 different bacteria  
706 strains. Bacterial diet fails to influence mouth-form ratio. N=3 replicates for each  
707 assay. (B) Pharyngeal pumping behavior of *P. pacificus* PS312 on 25 different  
708 bacterial diets. N=20 replicates for each assay.  
709 (C) Corpse assay illustrating affect of bacterial diet switching from *E. coli* OP50 to  
710 *Novosphingobium* L76 at particular *P. pacificus* development stages. Corpse assays  
711 were performed with young adults suggesting feeding with *Novosphingobium* L76 at  
712 diverse developmental stages modify killing behavior. (D) Corpse assays of *P.*  
713 *pacificus* previously fed with a mixture of *Novosphingobium* L76 and *E. coli* OP50 at  
714 1/10, 1/100 and 1/1000 concentrations. Low concentrations of *Novosphingobium* L76  
715 in the diet is sufficient to influence killing behavior. Bacteria were spotted to NGM  
716 without peptone to prevent bacterial growth. N=10 replicates for each assay. (E)  
717 Corpse assays of *P. pacificus* previously fed on either *Novosphingobium* L76 or  
718 *Novosphingobium* LE124. The increased killing behaviors are observed in both  
719 strains of *Novosphingobium*. N=10 replicates for each assay.

### 720 **Figure S2. Mutations in multiple pathways affect dietary sensor expression and** 721 **predatory behavior.**

722 (A) A phylogenetic analysis of *acs-19* and *let-767* homologs indicates that individual  
723 members of the Acyl CoA synthase family and (B) the steroid dehydrogenase family  
724 (panel B) have undergone lineage specific duplications. Nodes with bootstrap  
725 support  $\geq 90/100$  are labeled with stars and arrows mark *P. pacificus* genes that were  
726 used as dietary sensors.  
727 (C) Images of *Ppa-acs-19.1::RFP* dietary sensor showing purine (*N. lin.* LE124  
728 *PurA::Tn5*, *N. lin.* LE124 *PurD::Tn5*, *N. lin.* LE124 *PurE::Tn5*, *N. lin.* LE124  
729 *GuaB::Tn5* and *N. lin.* LE124 *PurM::Tn5*) and pyrimidine biosynthesis (*N. lin.* LE124  
730 *PryE::Tn5*) mutants increase the expression of the dietary sensor in comparison to  
731 *N. lin.* LE124 wild-type diet. (D) Corpse assays of *P. pacificus* fed with *N. lin.* LE124  
732 mutants from vitamin B12 (green), purine (white), pyrimidine biosynthesis (grey) and  
733 nitrogen metabolism (dark grey) all decreasing killing efficiency in comparison to *N.*  
734 *lin.* LE124 wild-type diet. N=10 replicates for each assay. (E) Bite assays of *P.*  
735 *pacificus* previously fed on *E. coli* OP50, *N. lin.* LE124 and *N. lin.* LE124 mutants

736 from vitamin B12 (green), purine (white), pyrimidine biosynthesis (grey) and nitrogen  
737 metabolism (dark grey) modulating killing efficiency. Ten replicates for each assay.

738 **Figure S3. Vitamin B12 regulates fatty acid gene expression and development.**

739 **(A)** *Ppa-acS-19.1* transgenic worms were grown on NGM plates supplemented with  
740 various concentrations of vitamin B12. NGM plates without vitamin B12 spotted with  
741 *E. coli* OP50 and *N. lin.* LE124 were used as controls. Images of transgenic animals  
742 were taken to determine the most efficient vitamin B12 concentration. Vitamin B12  
743 supplemented *E. coli* OP50 phenocopies *N. lin.* LE124 effect on *Ppa-acS-19.1*  
744 expression.

745 **(B)** *Ppa-acS-19.1* transgenic worms were added to NGM plates with *N. lin.* LE124  
746 transposon mutants and with/without supplementation with 500 nM vitamin B12. *E.*  
747 *coli* OP50 and *N. lin.* LE124 were as controls. Vitamin B12 supplementation rescued  
748 *Ppa-acS-19.1* expression on *N. lin.* LE124 *CbiQ::Tn5* mutant (blue highlighted box).

749 **Figure S4. Vitamin B12 dependent metabolic pathways.**

750 **(A)** Network of the main two vitamin B12-dependent pathways. *P. pacificus*  
751 Orthologous of genes labeled in green were mutated with CRISPR/Cas9.  
752 Orthologous of red-labeled *acs-19* used as dietary sensor.

753 **(B)** One-to-one orthologs could be identified for *metr-1* **(C)** and *mce-1*. Nodes with  
754 bootstrap support  $\geq 90/100$  are labeled with stars and arrows mark *P. pacificus*  
755 genes that were used for functional studies. **(D)** Mutations were induced in both *Ppa-*  
756 *metr-1* and *Ppa-mce-1* using CRISPR/Cas9 with the  
757 target locations indicated in both genes (scissors). Mutations induced via  
758 CRISPR/Cas9 are also shown. **(E)** and **(F)** Developmental staging of  
759 *Rhabditophanes sp.* and *A. sudhausi* on *E. coli* OP50 NGM plates supplemented  
760 with/without vitamin B12. The development of *Rhabditophanes sp.* and *A. sudhausi*  
761 was accelerated with vitamin B12 supplementation. N=10 replicates for each assay.

762 **SUPPLEMENTARY TABLE LEGENDS**

763 **Table S1.** List of strains and other resources that were used in this study.

764 **Table S2.** List of differentially expressed genes between *P. pacificus* grown on *E.coli*  
765 OP50 and *Novosphingobium* L76 . List includes *P. pacificus* gene identifiers, the  
766 associated expression fold changes, FDR corrected P-values and where appropriate  
767 the identified *C. elegans* orthologous genes can be found in a separate excel file.

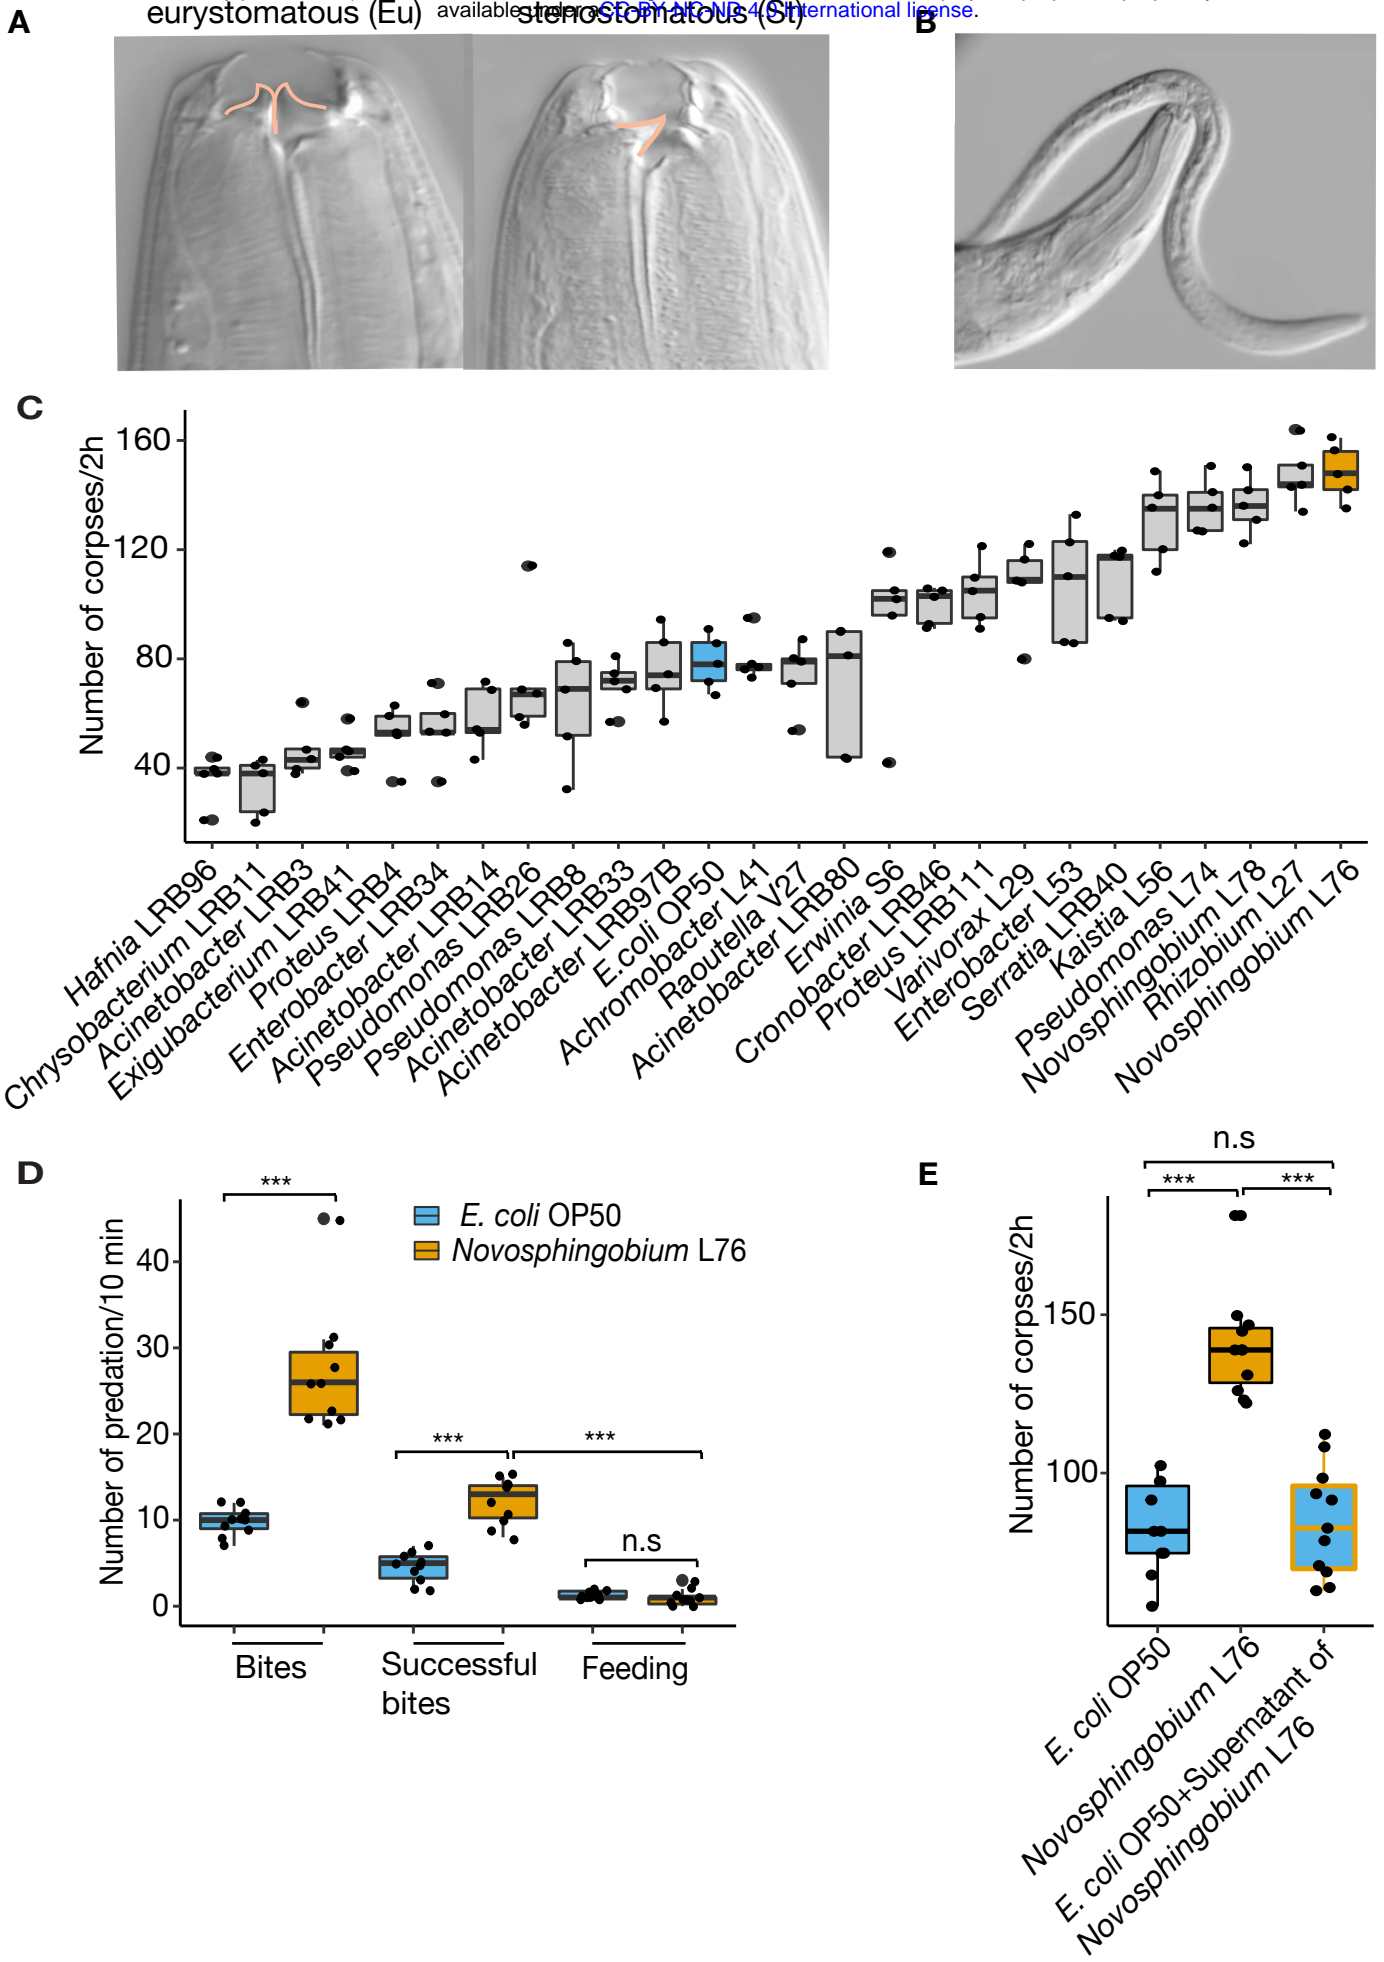

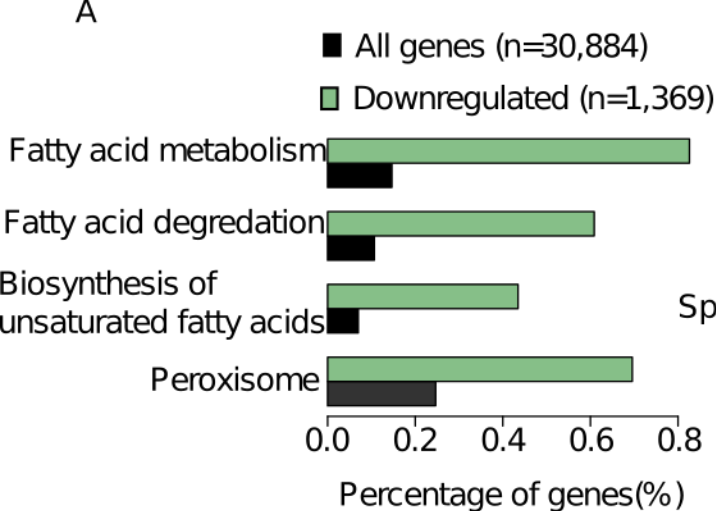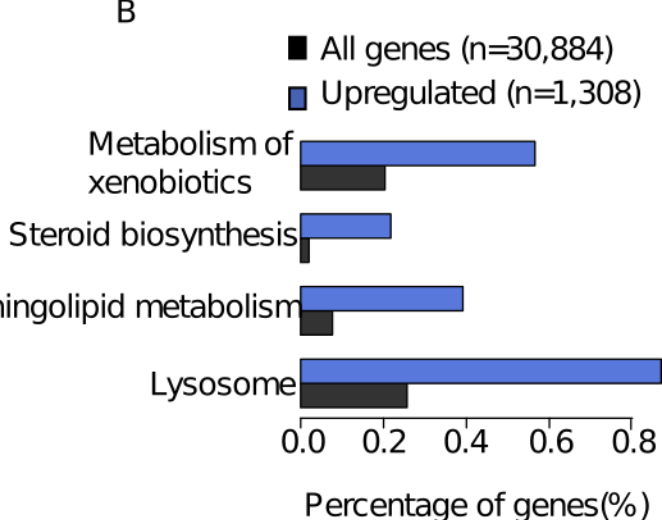

**C** *Ppa-acs-19.1::RFP* expression

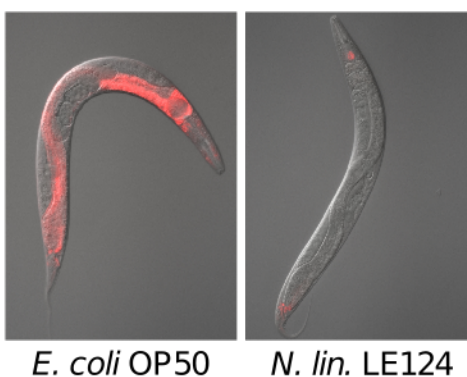

**D** *Ppa-stdh-1::RFP* expression

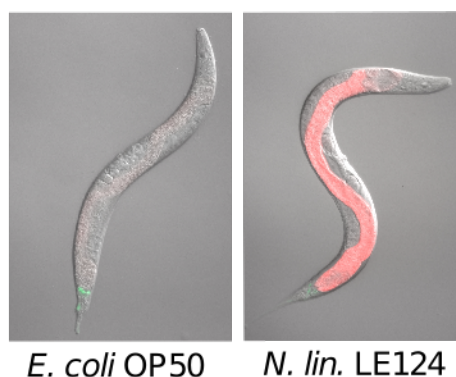

**E** *Ppa-acs-19.1::RFP* expression

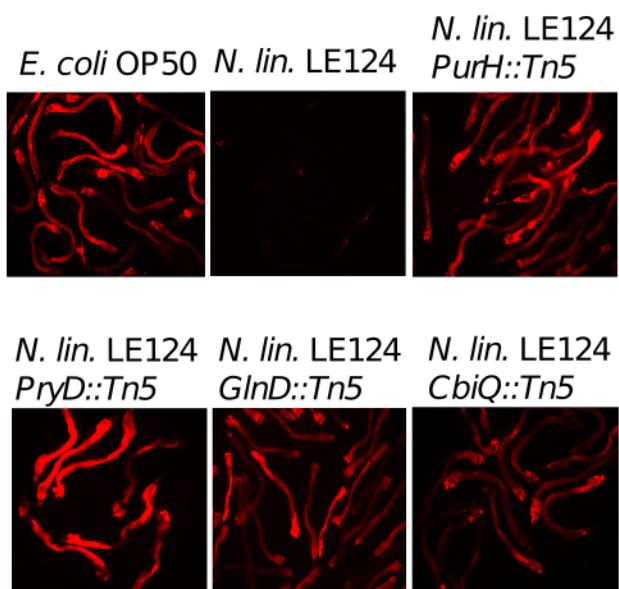

**F**

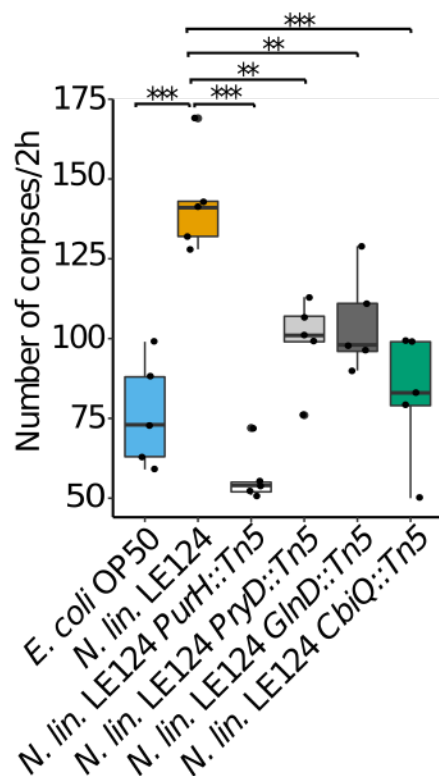

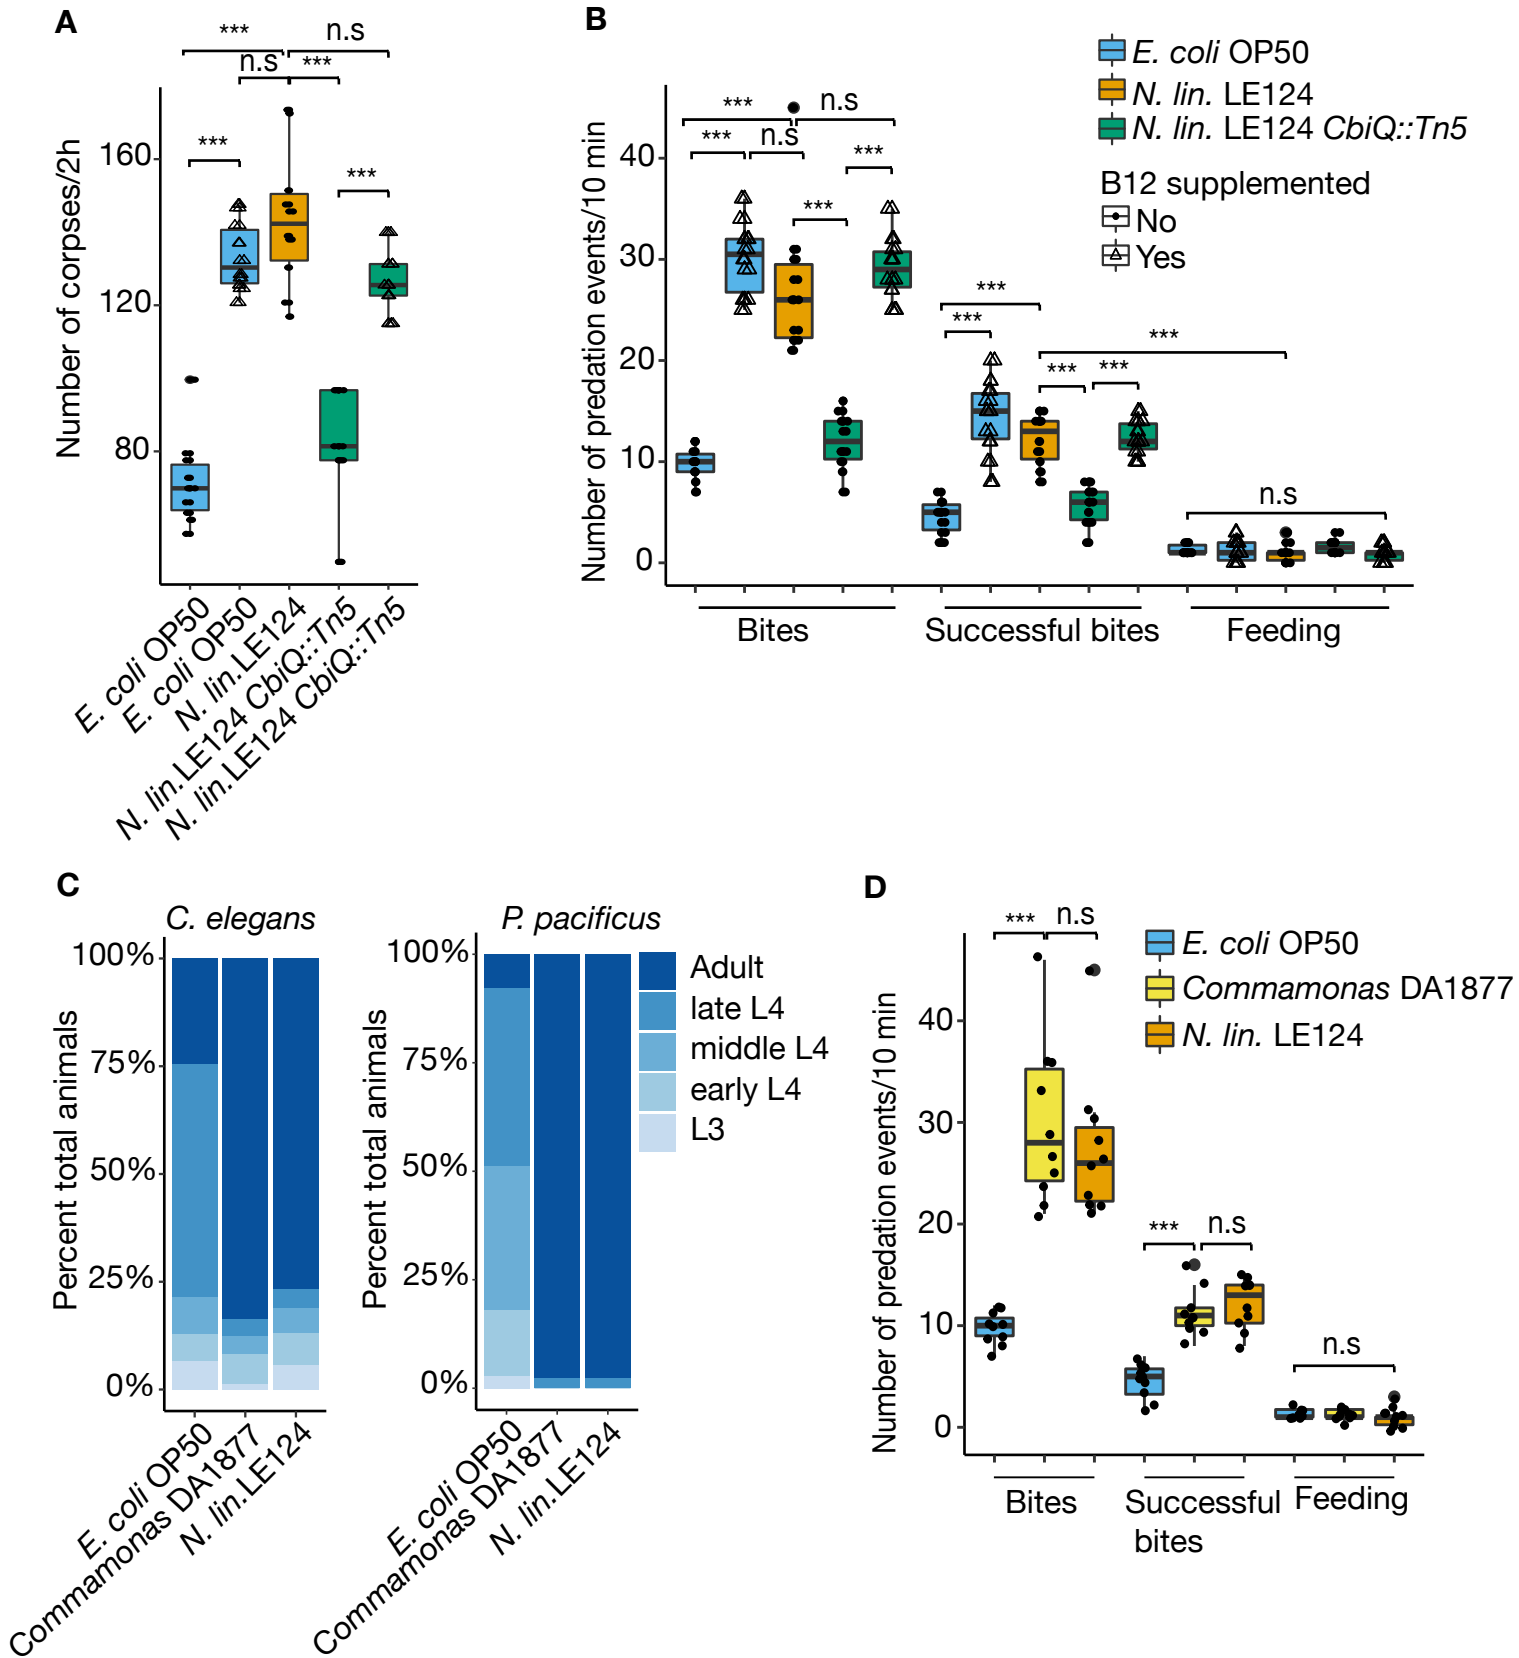

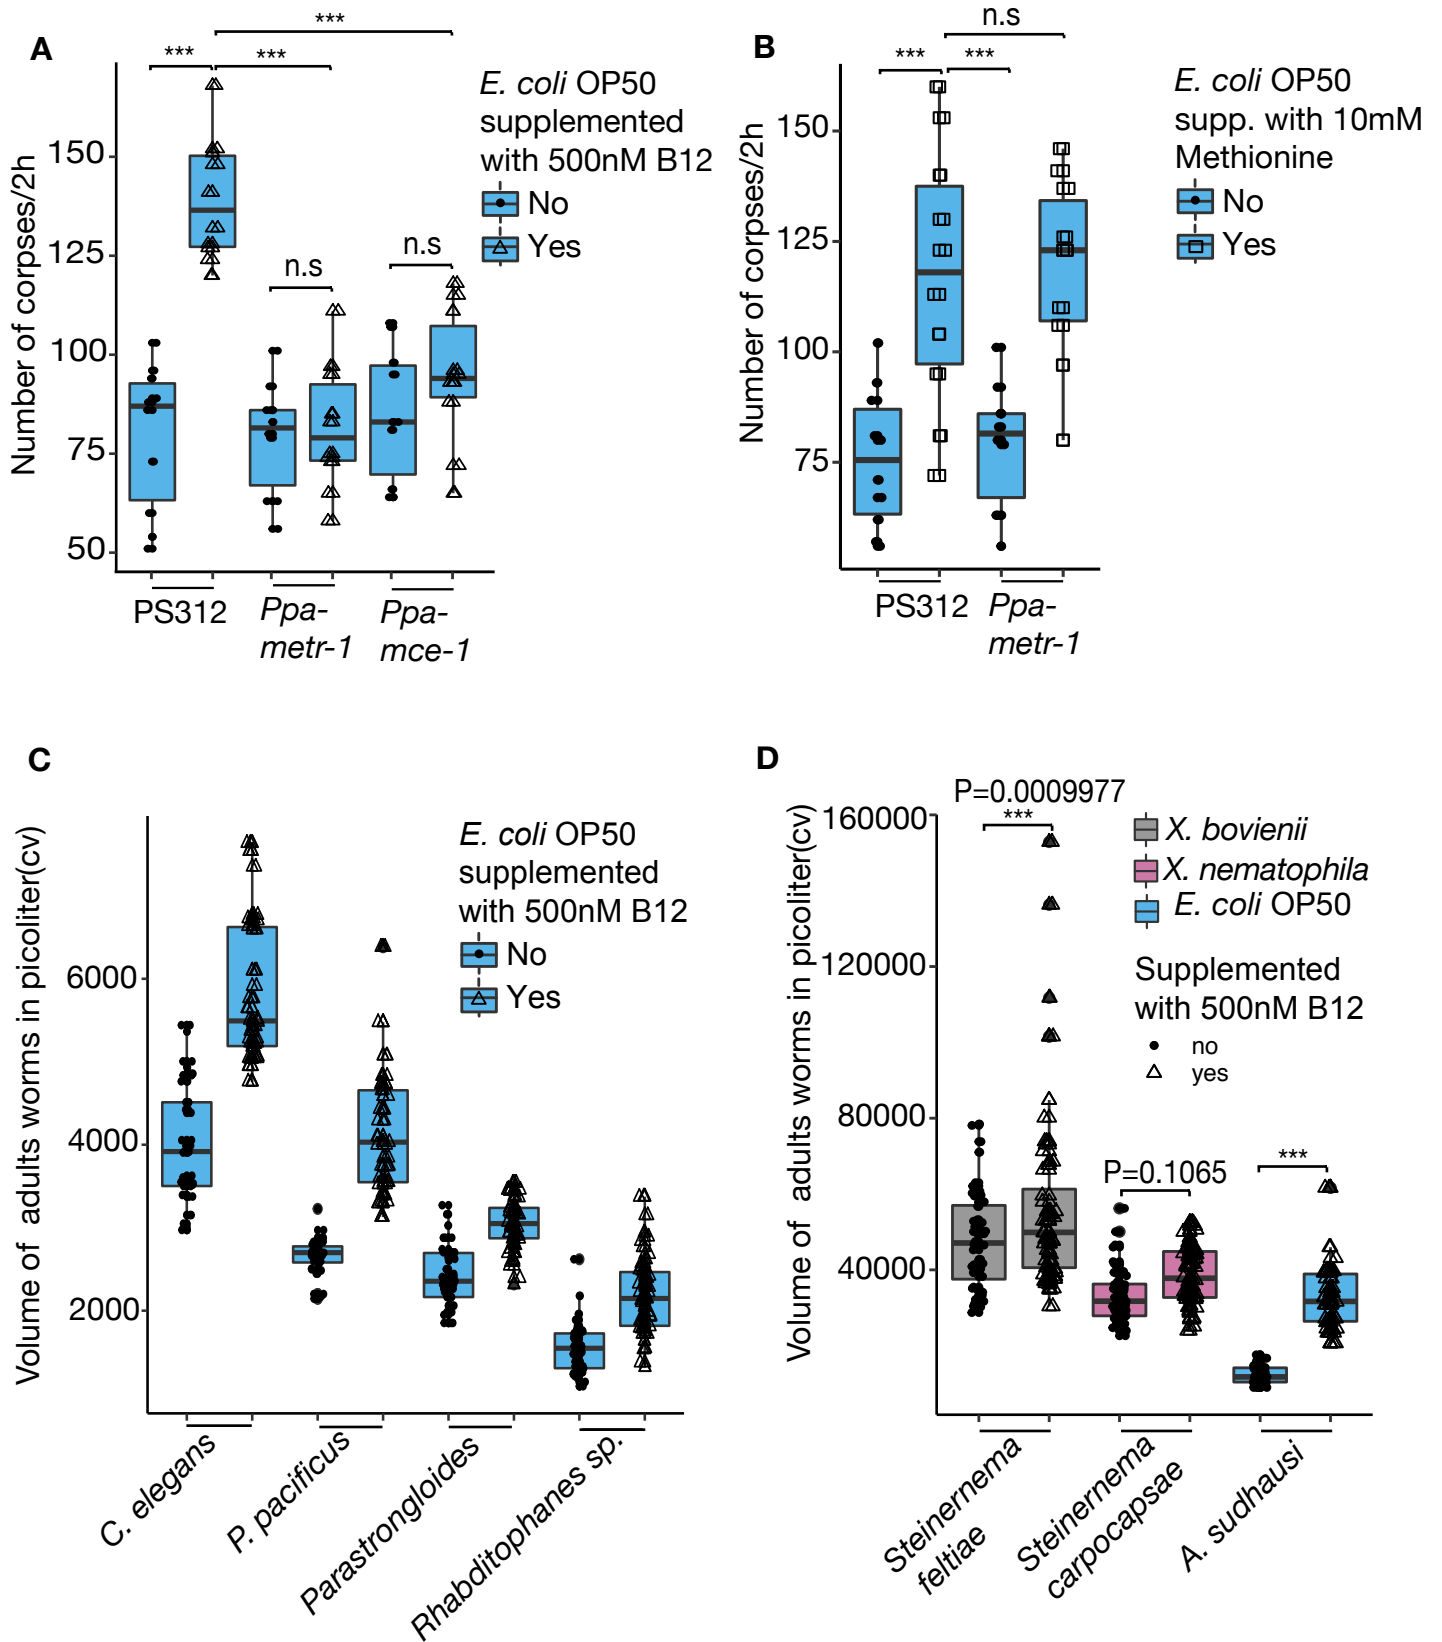



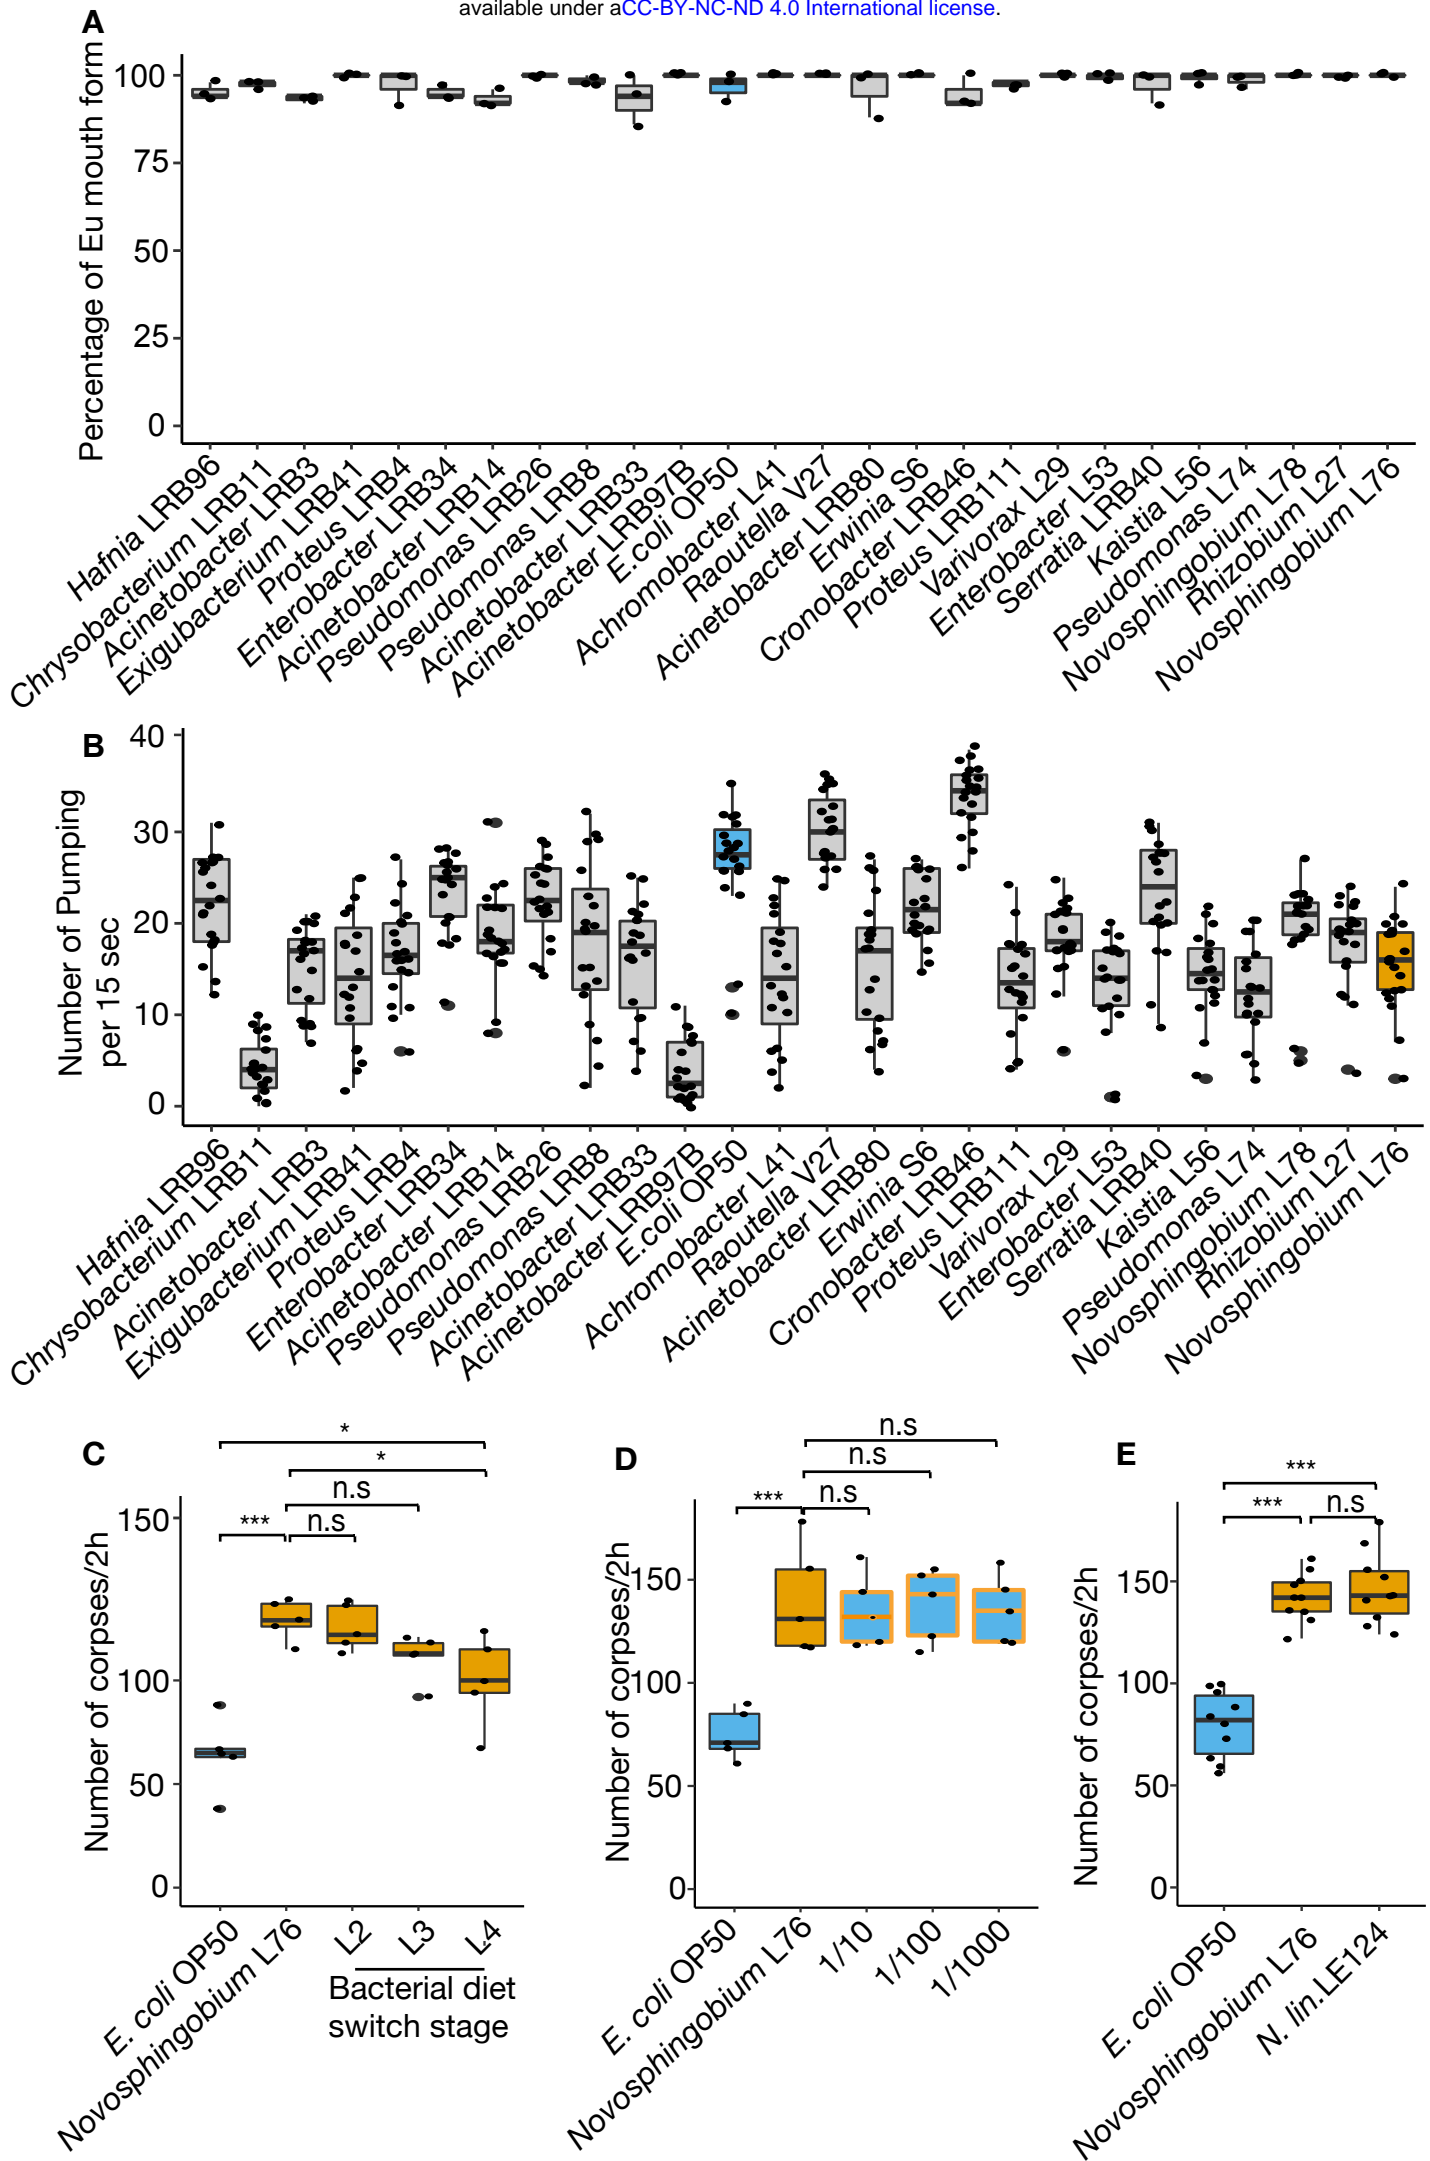

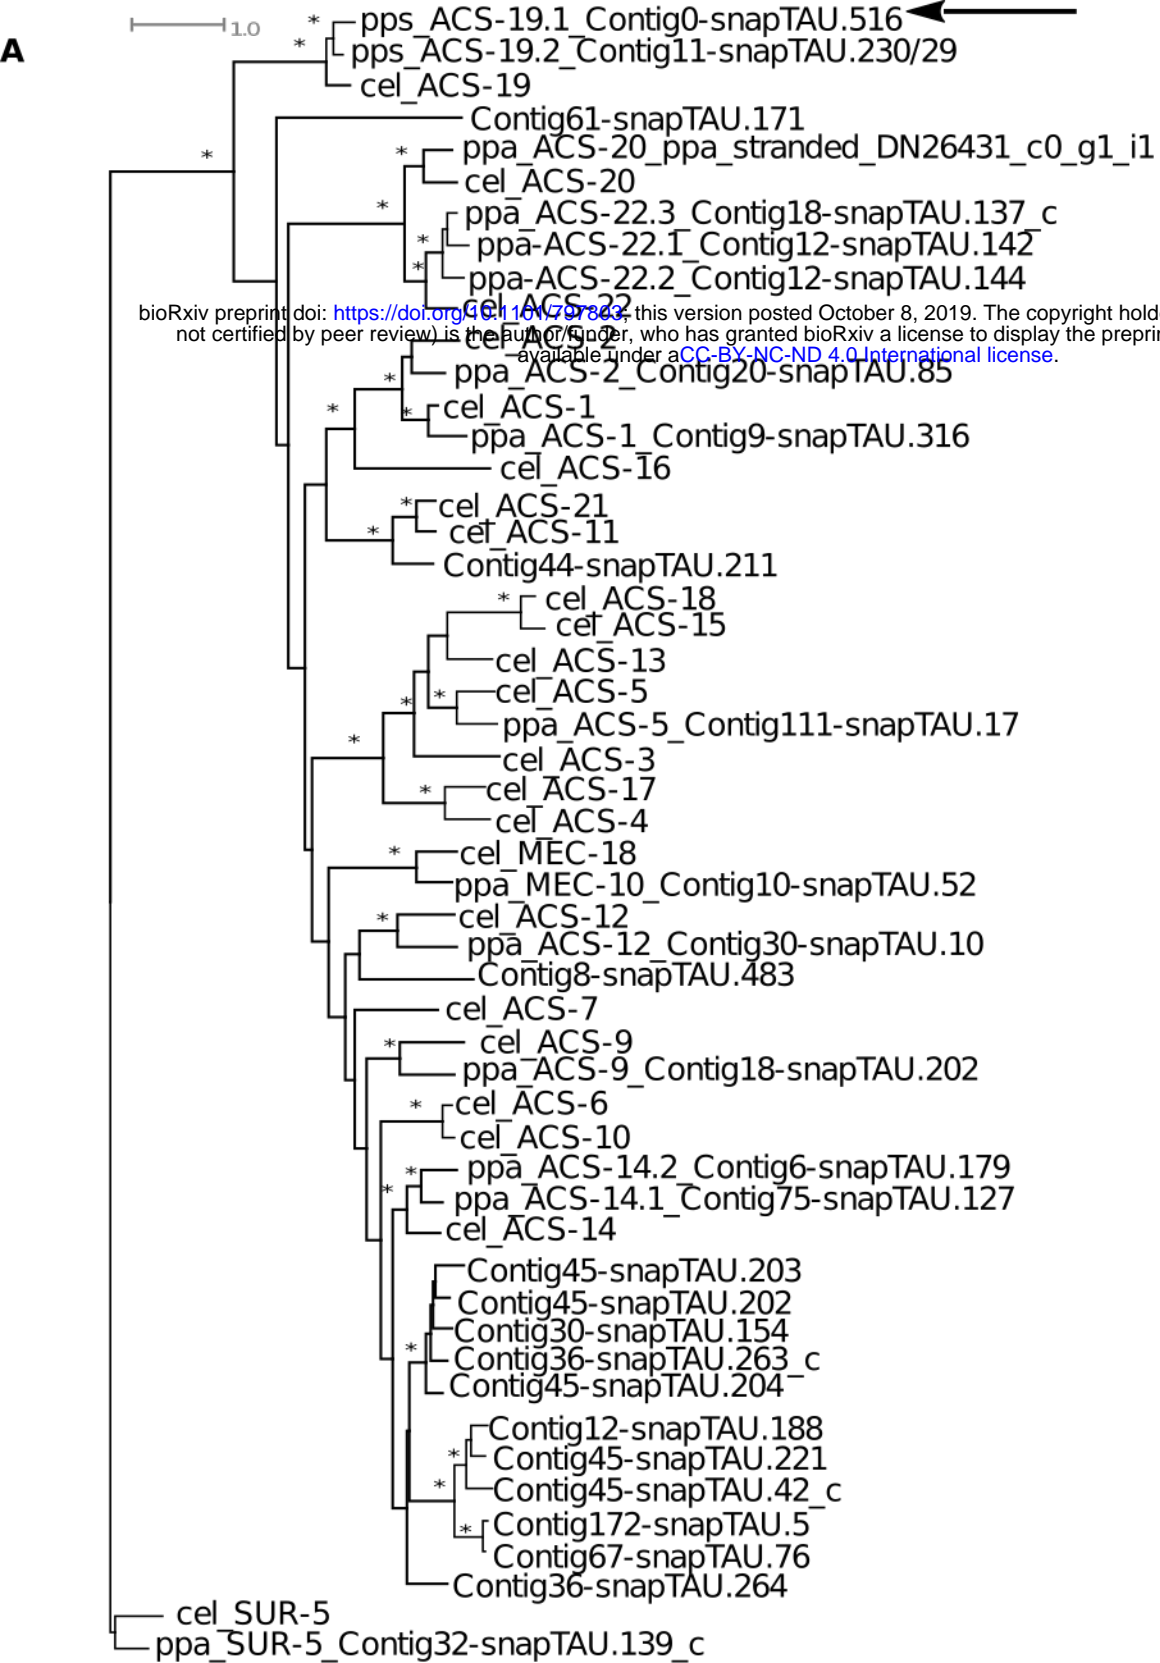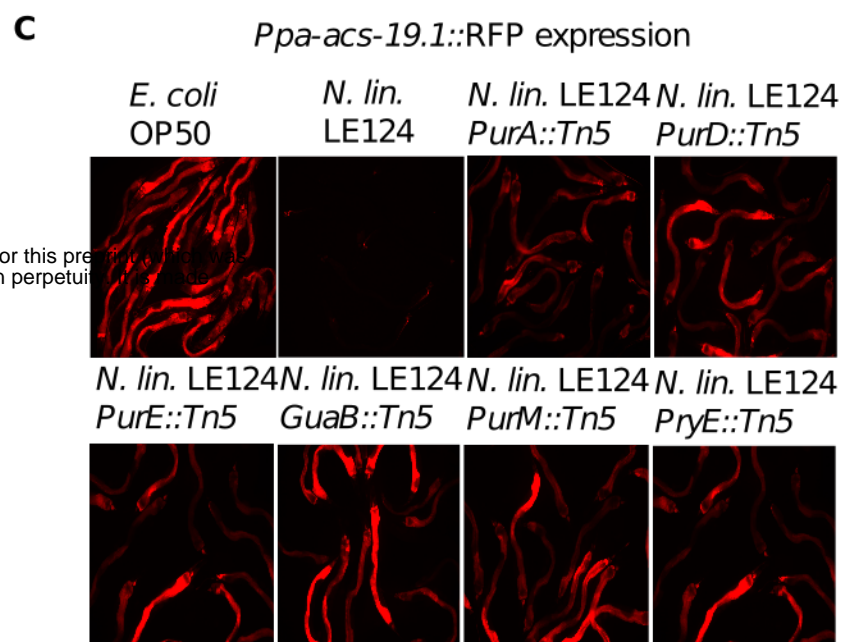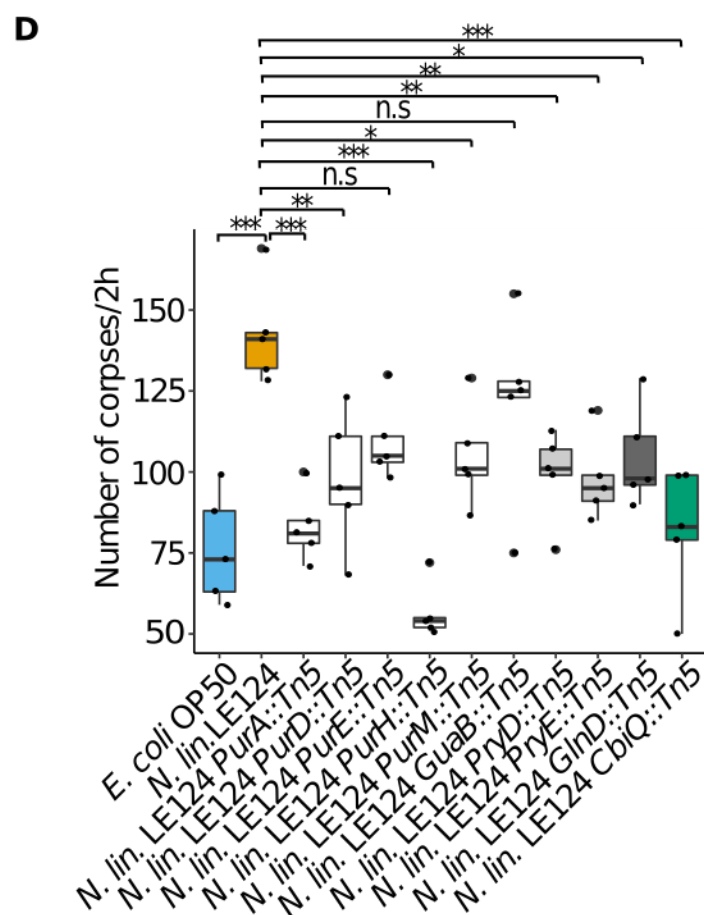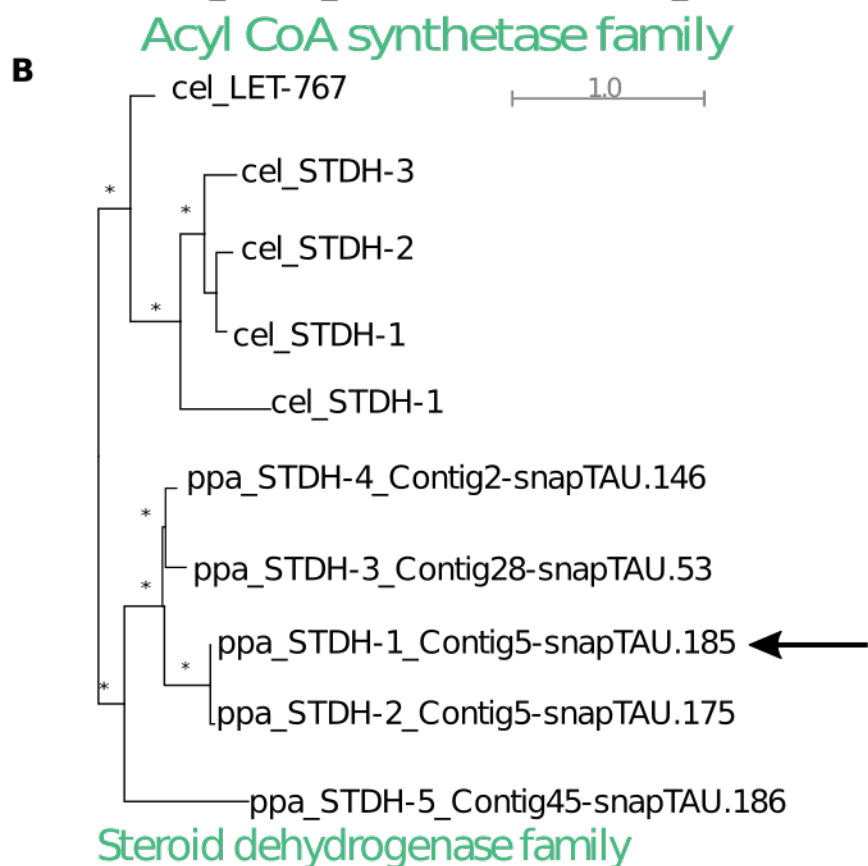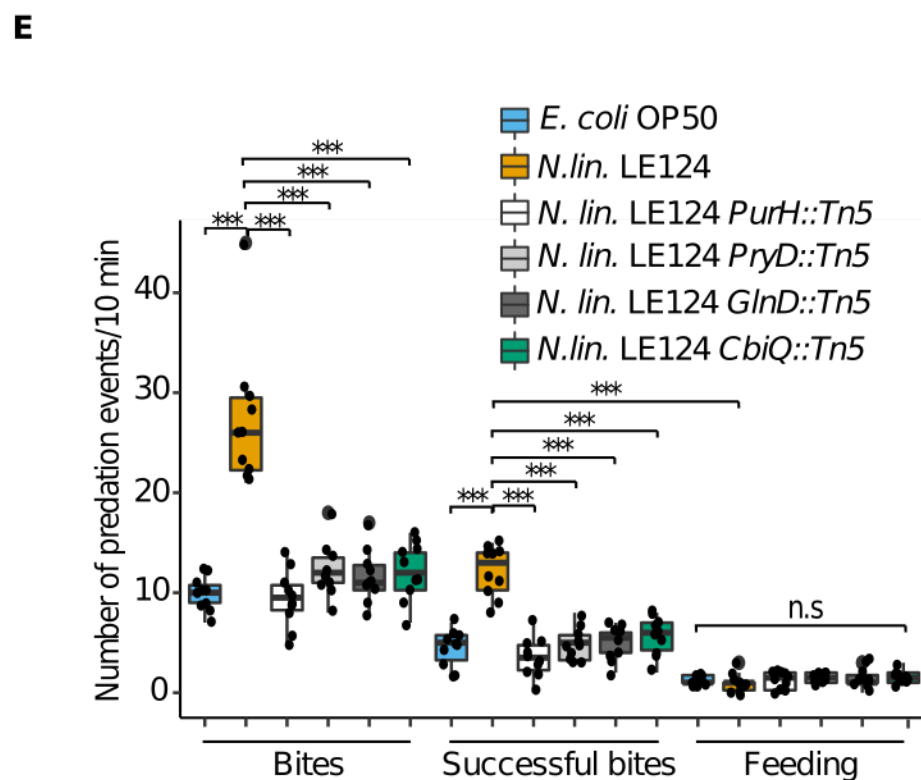

**A***Ppa-acs-19.1::RFP* expression *E. coli* OP50 diet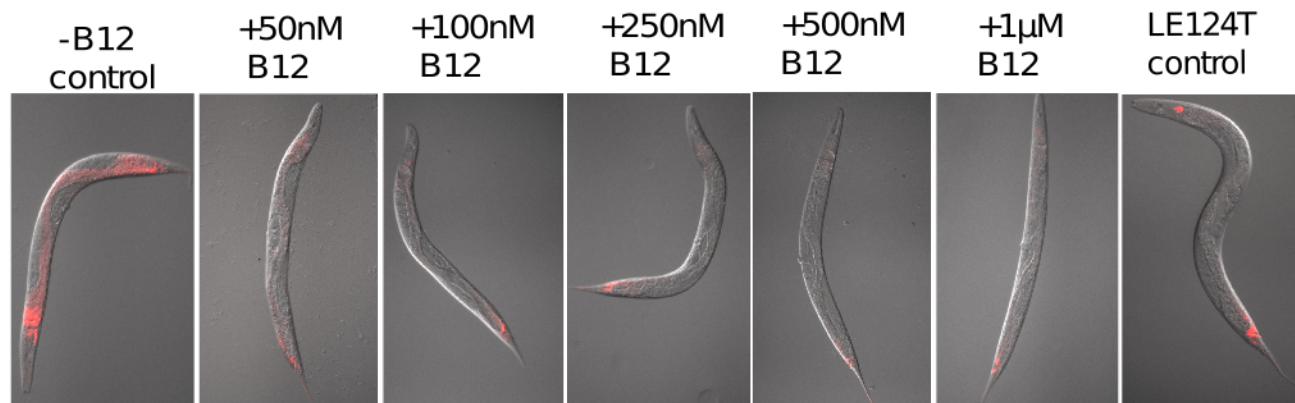**B***Ppa-acs-19.1::RFP* expression on *Novosphingobium* LE124T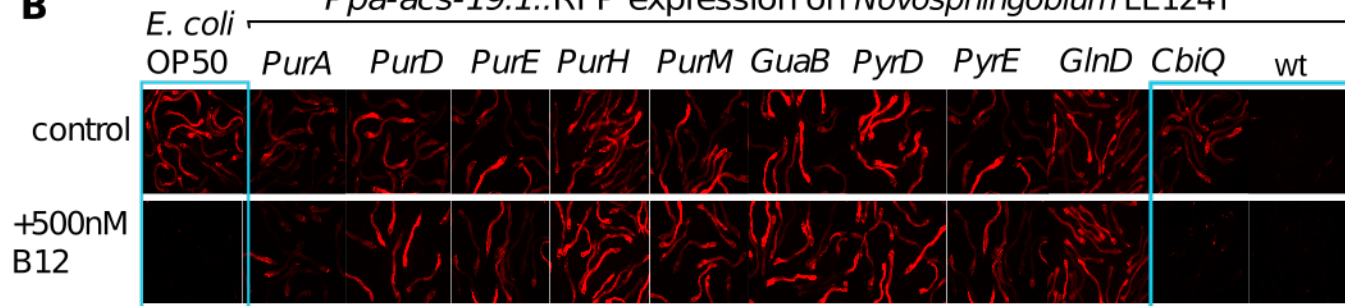

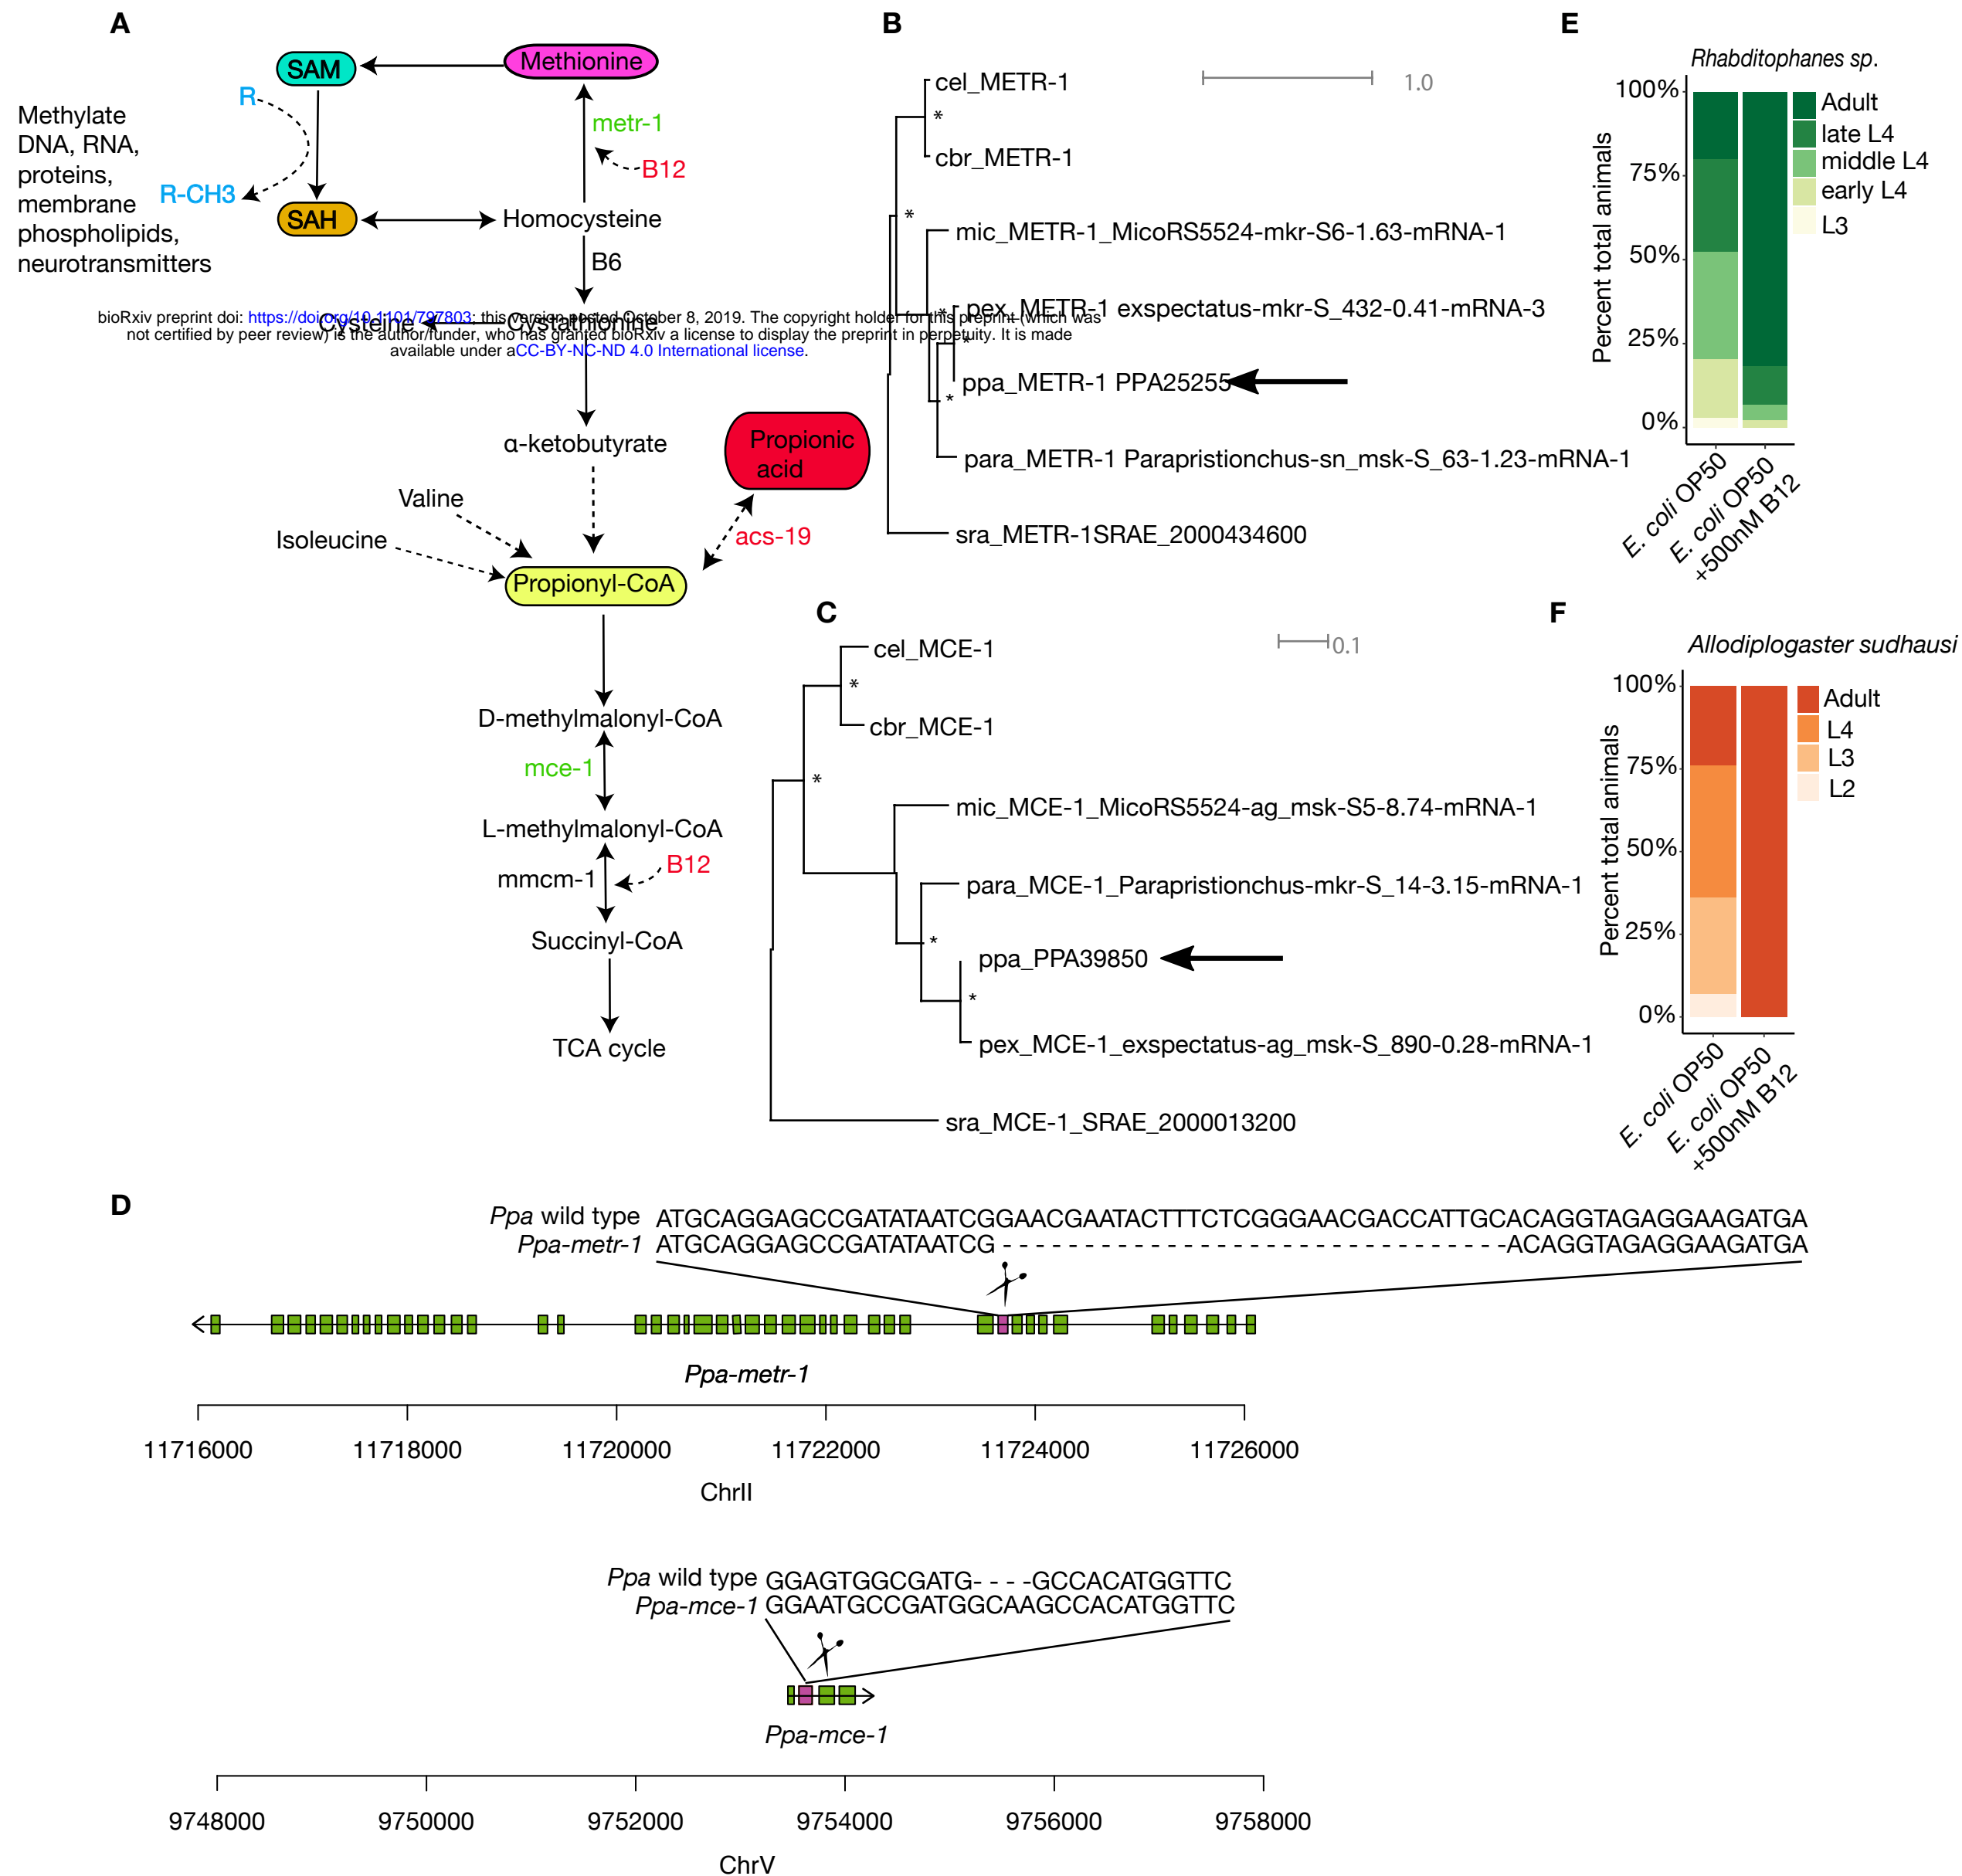

**Supplementary Table 1**

| REAGENT or RESOURCE                                               | SOURCE                                                           | IDENTIFIER          |
|-------------------------------------------------------------------|------------------------------------------------------------------|---------------------|
| <b>Bacterial strains</b>                                          |                                                                  |                     |
| <i>E.coli</i> OP50                                                | Caenorhabditis Genetics Center (CGC)                             | RRID:WB-STRAIN:OP50 |
| <i>Comamonas aq.</i> DA1877                                       | Caenorhabditis Genetics Center (CGC)                             | N/A                 |
| <i>Novosphingobium lindaniclasticum</i> LE124                     | German collection of microorganisms and cell culture GmbH (DSMZ) | N/A                 |
| <i>Hafnia</i> LRB96                                               | Akduman et al., 2018                                             | N/A                 |
| <i>Chrysobacterium</i> LRB11                                      | Akduman et al., 2018                                             | N/A                 |
| <i>Acinetobacter</i> LRB3                                         | Akduman et al., 2018                                             | N/A                 |
| <i>Exiguobacterium</i> LRB41                                      | Akduman et al., 2018                                             | N/A                 |
| <i>Proteus</i> LRB4                                               | Akduman et al., 2018                                             | N/A                 |
| <i>Enterobacter</i> LRB34                                         | Akduman et al., 2018                                             | N/A                 |
| <i>Acinetobacter</i> LRB14                                        | Akduman et al., 2018                                             | N/A                 |
| <i>Pseudomonas</i> LRB26                                          | Akduman et al., 2018                                             | N/A                 |
| <i>Pseudomonas</i> LRB8                                           | Akduman et al., 2018                                             | N/A                 |
| <i>Acinetobacter</i> LRB33                                        | Akduman et al., 2018                                             | N/A                 |
| <i>Acinetobacter</i> LRB97B                                       | Akduman et al., 2018                                             | N/A                 |
| <i>Achromobacter</i> L41                                          | Akduman et al., 2018                                             | N/A                 |
| <i>Raoultella</i> V27                                             | Akduman et al., 2018                                             | N/A                 |
| <i>Acinetobacter</i> LRB80                                        | Akduman et al., 2018                                             | N/A                 |
| <i>Erwinia</i> S6                                                 | Akduman et al., 2018                                             | N/A                 |
| <i>Cronobacter</i> LRB46                                          | Akduman et al., 2018                                             | N/A                 |
| <i>Proteus</i> LRB111                                             | Akduman et al., 2018                                             | N/A                 |
| <i>Variovorax</i> L29                                             | Akduman et al., 2018                                             | N/A                 |
| <i>Enterobacter</i> L53                                           | Akduman et al., 2018                                             | N/A                 |
| <i>Serratia</i> LRB40                                             | Akduman et al., 2018                                             | N/A                 |
| <i>Kaistia</i> L56                                                | Akduman et al., 2018                                             | N/A                 |
| <i>Pseudomonas</i> L74                                            | Akduman et al., 2018                                             | N/A                 |
| <i>Novosphingobium</i> L78                                        | Akduman et al., 2018                                             | N/A                 |
| <i>Rhizobium</i> L27                                              | Akduman et al., 2018                                             | N/A                 |
| <i>Novosphingobium</i> L76                                        | Akduman et al., 2018                                             | N/A                 |
| <i>Novosphingobium lindaniclasticum</i> LE124<br><i>PurA::Tn5</i> | This study                                                       | N/A                 |
| <i>Novosphingobium lindaniclasticum</i> LE124<br><i>PurD::Tn5</i> | This study                                                       | N/A                 |
| <i>Novosphingobium lindaniclasticum</i> LE124<br><i>PurE::Tn5</i> | This study                                                       | N/A                 |
| <i>Novosphingobium lindaniclasticum</i> LE124<br><i>PurH::Tn5</i> | This study                                                       | N/A                 |
| <i>Novosphingobium lindaniclasticum</i> LE124<br><i>PurM::Tn5</i> | This study                                                       | N/A                 |

|                                                                                         |                                                       |                       |
|-----------------------------------------------------------------------------------------|-------------------------------------------------------|-----------------------|
| <i>Novosphingobium lindaniclasticum</i> LE124<br><i>GuaB::Tn5</i>                       | This study                                            | N/A                   |
| <i>Novosphingobium lindaniclasticum</i> LE124<br><i>PryD::Tn5</i>                       | This study                                            | N/A                   |
| <i>Novosphingobium lindaniclasticum</i> LE124<br><i>PryE::Tn5</i>                       | This study                                            | N/A                   |
| <i>Novosphingobium lindaniclasticum</i> LE124<br><i>GlnD::Tn5</i>                       | This study                                            | N/A                   |
| <i>Novosphingobium lindaniclasticum</i> LE124<br><i>CbiQ::Tn5</i>                       | This study                                            | N/A                   |
| <b>Chemicals, Peptides, and Recombinant Proteins</b>                                    |                                                       |                       |
| Alt-R CRISPR-Cas9 tracrRNA                                                              | Integrated DNA Technologies                           | Cat#1072534           |
| EnGen Cas9 NLS, <i>S. pyogenes</i>                                                      | New England Biolabs                                   | Cat#M0646M            |
| Methylcobalamin                                                                         | Sigma-Aldrich                                         | CAS Number 63-68-3    |
| L-Methionine                                                                            | Sigma-Aldrich                                         | Lot#SLBZ1683          |
| Kanamycin                                                                               | Sigma-Aldrich                                         | CAS Number 70560-51-9 |
| FastDigest PstI                                                                         | ThermoFisher Scientific                               | Cat# FD0615           |
| FastDigest BamHI                                                                        | ThermoFisher Scientific                               | Cat# FD0054           |
| Gibson Assembly® Cloning Kit                                                            | New England Biolabs                                   | Cat# E5510S           |
| <b>Experimental Models: Organisms/Strains</b>                                           |                                                       |                       |
| <i>Pristionchus pacificus</i> : strain PS312                                            | Stock of Dep. IV, MPI Developmental Biology Tuebingen | N/A                   |
| <i>C. elegans</i> ; strain N2 Bristol                                                   | Caenorhabditis Genetics Center (CGC)                  | N/A                   |
| <i>Rhabditophanes sp</i> ; strain KR3021                                                | Stock of Dep. IV, MPI Developmental Biology Tuebingen | N/A                   |
| <i>Parastrongyloides trichosuri</i>                                                     | Stock of Dep. IV, MPI Developmental Biology Tuebingen | N/A                   |
| <i>Allodiplogaster sudhausi</i> : strain SB413                                          | Stock of Dep. IV, MPI Developmental Biology Tuebingen | N/A                   |
| <i>Steinernema carpocapsae</i>                                                          | R. Ehlers                                             | N/A                   |
| <i>P. pacificus</i> strain RS3271 ( <i>Ppa-stdh-1::RFP</i> + <i>Ppa-egl-20::Venus</i> ) | This study                                            | N/A                   |
| <i>P. pacificus</i> strain RS3379                                                       | This study                                            | N/A                   |

|                                                                                 |                       |              |
|---------------------------------------------------------------------------------|-----------------------|--------------|
| ( <i>Ppa-ac</i> s-19.1::RFP + <i>Ppa-egl</i> -20::RFP)                          |                       |              |
| <i>Pristionchus pacificus</i> : strain RS3653: <i>mce-1</i> (tu1433)            | This study            | N/A          |
| <i>Pristionchus pacificus</i> : strain RS3654: <i>mce-1</i> (tu1434)            | This study            | N/A          |
| <i>Pristionchus pacificus</i> : strain RS3655: <i>mce-1</i> (tu1435)            | This study            | N/A          |
| <i>Pristionchus pacificus</i> : strain RS3656: <i>met-1</i> (tu1436)            | This study            | N/A          |
| <i>Pristionchus pacificus</i> : strain RS3657: <i>met-1</i> (tu1437)            | This study            | N/A          |
| <b>Oligonucleotides</b>                                                         |                       |              |
| <i>Ppa-stdh-1</i> - F: 5'-GCCAAGCTTGCATGCCTGCA CATGCTATGGAGCGTAGC-3'            | This study            | N/A          |
| <i>Ppa-stdh-1</i> - R: 5'-CTGAAAAAAAAAACCCAAGC TTGGGTCCCGAAGACGACGT TGTAGAC-3'; | This study            | N/A          |
| <i>Ppa-ac</i> s-19.1 -F 5'-GGATCCCGTTCGACCTGCAG GCATG-3                         | This study            | N/A          |
| <i>Ppa-ac</i> s-19.1 -R 5'-ATGAGCGAGCTGATCAAG-3                                 | This study            | N/A          |
| <i>TurboRFP</i> -F 5'-TGCATGCCTGCAGGTTCGACG GGATCCGCCATCACTATGCA TTGCTG-3'      | This study            | N/A          |
| <i>TurboRFP</i> -R 5'-TCCTTGATCAGCTCGCTCAT CTGAACCAGCAAGGGCGATA G-3             | This study            | N/A          |
| KAN-2 FP-1 Forward Primer 5'-ACCTACAACAAAGCTCTCAT CAACC-3'                      | Epicentre, Madison WI | Cat#TSM0 8KR |
| R6KAN-2 RP-1 Reverse Primer 5'-CTACCCTGTGGAACACCTAC ATCT-3'                     | Epicentre, Madison WI | Cat#TSM0 8KR |
| sgRNA target sequence: exon 2 of <i>mce-1</i> :<br>CCATGTGGCCATCGCCACTC         | This study            | N/A          |
| sgRNA target sequence: exon 11 of <i>metr-1</i> :<br>AAAATGTATCTGGATGCAGG       | This study            | N/A          |
| <b>Recombinant DNA</b>                                                          |                       |              |
| Plasmid: pUC19- <i>egl-20p</i> :: <i>TurboRFP</i> :: <i>rpl-23utr</i>           | Schlager et al., 2009 | N/A          |
| Plasmid: pUC19- <i>egl-20p</i> :: <i>Venus</i> :: <i>rpl-23utr</i>              | Okumura et al., 2017  | N/A          |
| Plasmid: pUC19- <i>acs-</i>                                                     | This study            | N/A          |

|                                                               |                                                                   |                 |
|---------------------------------------------------------------|-------------------------------------------------------------------|-----------------|
| <i>19.1p::TurboRFP::rpl-23utr</i>                             |                                                                   |                 |
| Plasmid: pUC19- <i>stdh-1::TurboRFP::rpl-23utr</i>            | This study                                                        | N/A             |
| EZ-Tn5 R6Kyori/KAN-2>Tnp transposon                           | Epicentre, Madison WI                                             | Cat#TSM08KR     |
| <b>Software and Algorithms</b>                                |                                                                   |                 |
| FIJI                                                          | Schindelin et al., 2012                                           | N/A             |
| R                                                             | <a href="http://www.r-project.org/">http://www.r-project.org/</a> | N/A             |
| TopHat (version:2.0.14)                                       | Trapnell et al. 2012                                              | N/A             |
| Cuffdiff (version: 2.2.1)                                     | Trapnell et al. 2012                                              | N/A             |
| <b>Other</b>                                                  |                                                                   | N/A             |
| Total RNA was extracted using Direct-zol RNA Kits             | Zymo Research                                                     | Cat#R2051       |
| Truseq RNA library prep kit was used to prepare RNA libraries | Illumina Company                                                  | Cat#RS-122-2001 |
